# Supplementary material for: Design and synthesis of new phosphazine and triazole derivatives for treatment of Alzheimer's disease: modulating ROS/JNK and Wnt/β-catenin signaling pathways
Source: Royal Society of Chemistry journal article supplement (doi:10.1039/d5ra07584j), 2026-01-01
Supplement: d5ra07584j1.pdf [file d5ra07584j1.pdf]

## Appendix A

### **Synthesis of new phosphazine and triazole derivatives for treatment of Alzheimer's disease: modulating ROS/JNK and Wnt/ $\beta$ -catenin signaling pathways**

Rania S. Salah<sup>a</sup>, Naglaa F. El- Sayed<sup>b</sup>, Marwa El-Hussieny<sup>b</sup>, Shaimaa T. Mansour<sup>b</sup>, Mohamed Othman<sup>c</sup>, Marwa A. Fouad<sup>d,e</sup>, Huda R. M. Rashdan<sup>f</sup>, Ewies F. Ewies<sup>b\*</sup>, Heba S.A. Gharib<sup>g</sup>, Ghada H. Elsayed<sup>a,h\*</sup>

<sup>a</sup> Hormones Department, Medical Research and Clinical Studies Institute, National Research Centre, 33 El-Bohouth St., Dokki, 12622, Giza, Egypt.

<sup>b</sup> Organometallic and Organometalloid Chemistry Department, National Research Centre, 33ElBohouth St., (Former El Tahrir) Dokki, P.O. 12622, Giza, Egypt.

<sup>c</sup> Normandie Univ.; UNILEHAVRE, FR 3038 CNRS, URCOM 76600 Le Havre, France. UR 3221, INC3M CNRS-FR 3038 UFR ST, BP: 1123, 25 rue Philipe Lebon, 76063 Le Havre Cedex (France).

<sup>d</sup> Pharmaceutical Chemistry Department, Faculty of Pharmacy, Cairo University, Kasr El-Aini St., Cairo 11562, Egypt

<sup>e</sup> Pharmaceutical Chemistry Department, School of Pharmacy, Newgiza University, NewGiza, Km 22 Cairo-Alexandria Desert Road, Cairo, Egypt

<sup>f</sup> Chemistry of Natural and Microbial Products Department, Pharmaceutical and Drug Industries Research Institute, National Research Centre, 33 ElBohouth St., (Former El Tahrir) Dokki, P.O. 12622, Giza, Egypt.

<sup>g</sup> Behaviour and Management of animal, Poultry and Aquatics Department, Faculty of Veterinary Medicine, Zagazig University, P.O. Box 44511, Zagazig, Egypt.

<sup>h</sup> Stem Cells Lab, Centre of Excellence for Advanced Sciences, National Research Centre, 33 El-Bohouth St., Dokki, 12622, Giza, Egypt.

Corresponding authors:

**Ewies F. Ewies:** Organometallic and Organometalloid Chemistry Department, National Research Centre, 33 ElBohouth St., (Former El Tahrir) Dokki, P.O. 12622, Giza, Egypt. email: [ewiesfawzy@yahoo.com](mailto:ewiesfawzy@yahoo.com) ; [ef.ewies@nrc.sci.eg](mailto:ef.ewies@nrc.sci.eg)

**Ghada H. Elsayed:** Hormones Department, Medical Research and Clinical Studies Institute, National Research Centre, 33 El-Bohouth St., Dokki, 12622, Giza, Egypt.  
Stem Cells Lab, Centre of Excellence for Advanced Sciences, National Research Centre, 33 El-Bohouth St., Dokki, 12622, Giza, Egypt. email: [ghadanrc@yahoo.com](mailto:ghadanrc@yahoo.com)

## Experimental

### Chemistry

All chemicals were supplied by either Fluka or Aldrich chemical companies and were used without further purification. All melting points are uncorrected and were taken in open capillary tubes using Electrothermal apparatus 9100. Elemental microanalyses were carried out at Microanalytical Unit, Central Services Laboratory, National Research Centre, Dokki, Giza, Egypt, using Vario Elementar and were found within  $\pm 0.4\%$  of the theoretical values. **FT-IR** spectra were recorded with a Perkin-Elmer Frontier. Routine **NMR** spectra were recorded at room temperature on a Bruker Avance TM 300 or 400 spectrometer as solutions in dimethyl sulfoxide (DMSO) or in chloroform ( $\text{CDCl}_3$ ). All chemical shifts are quoted in  $\delta$  relative to the trace resonance of protonated chloroform ( $\delta$  7.25 ppm),  $\text{CDCl}_3$  ( $\delta$  77.0 ppm) or dimethyl sulfoxide ( $\delta$  2.50 ppm), DMSO ( $\delta$  39.51 ppm) and external 85% aqueous  $\text{H}_3\text{PO}_4$  ( $\delta$  0.0 ppm). The mass spectra were measured with a GC Finnigan MAT SSQ-7000 mass spectrometer. Follow up of the reactions and checking the purity of the compounds were made by Thin Layer Chromatography (TLC) on silica gel-precoated aluminum sheets (Type 60, F 254, Merck, Darmstadt, Germany) with eluent of petroleum ether (b.r. 60-80°C)/ethyl acetate and the spots were detected by exposure to UV lamp at  $\lambda_{254}$  nanometer for a few seconds. The chemical names given for the prepared compounds are according to the IUPAC system. The reported yields are based upon pure materials isolated by column chromatography with eluent of petroleum ether (b.r. 60-80°C)/ethyl acetate. Solvents were dried/purified according to conventional procedures.

## Experimental: Spectral Data

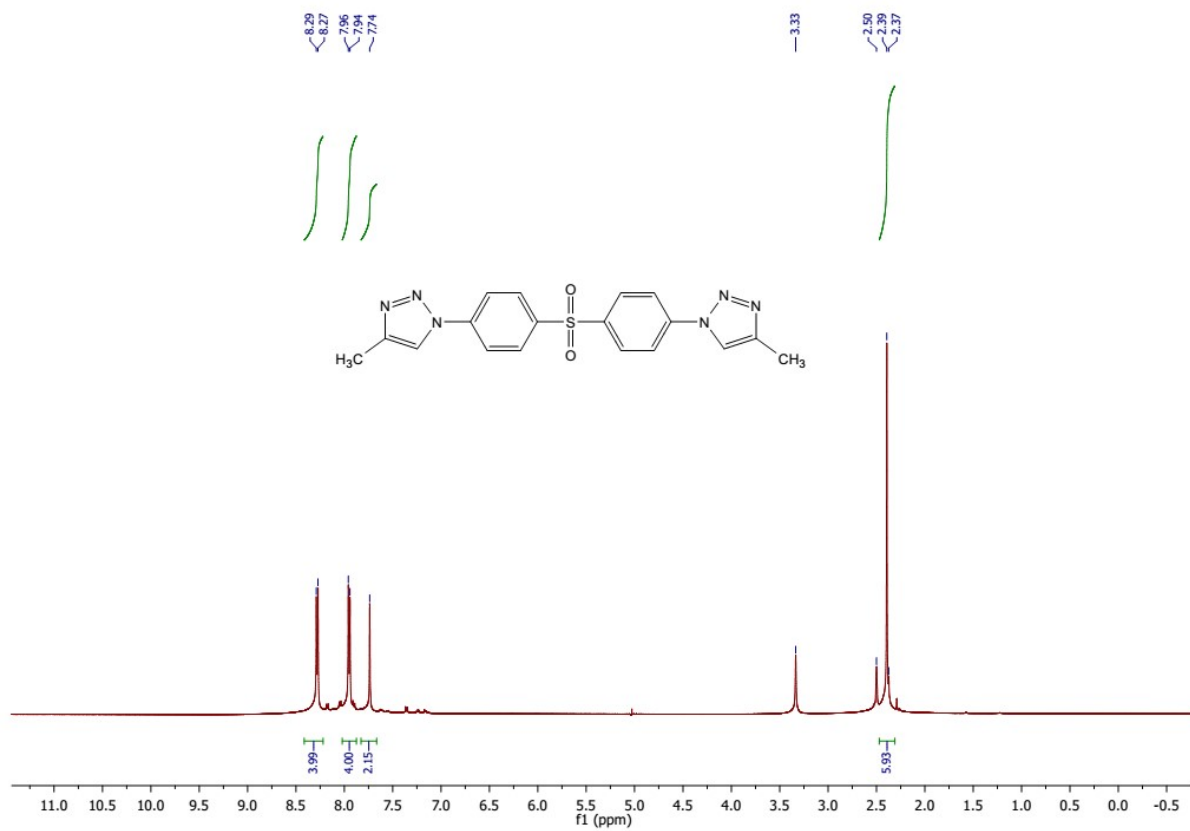

Figure : <sup>1</sup>H NMR of compound 3a

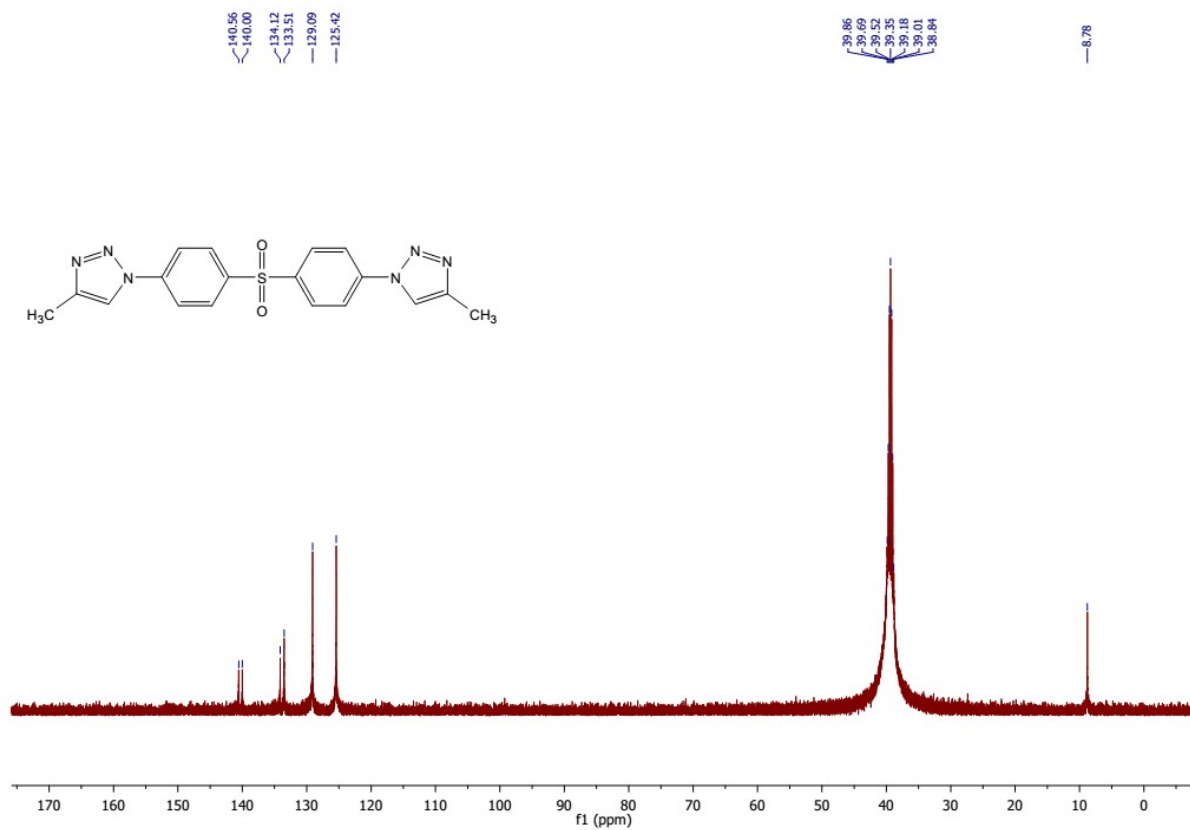

**Figure : <sup>13</sup>C NMR of compound 3a**

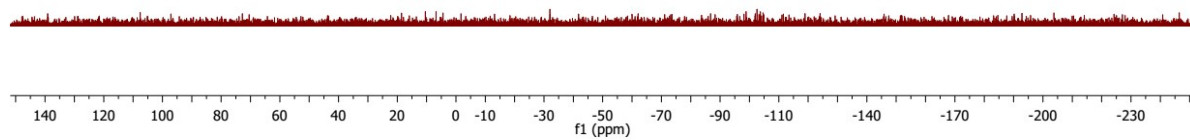

**Figure :  $^{13}\text{P}$  NMR of compound 3a**

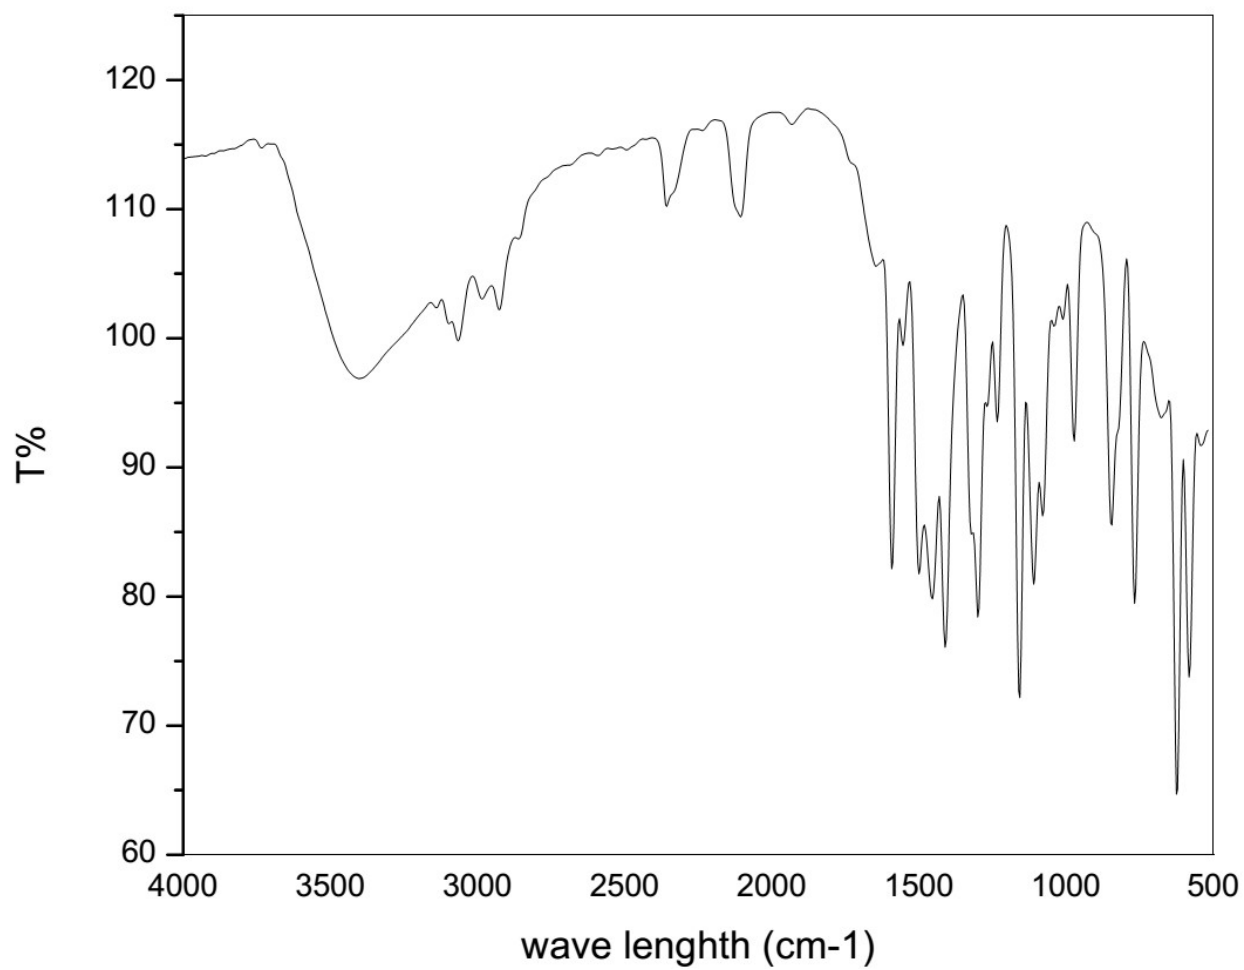

**Figure : IR chart of compound 3a**

Ewis-3a #1094 RT: 3.75 AV: 1 NL: 2.32E4

T: {0,0} + c EI Full ms [50.00-650.00]

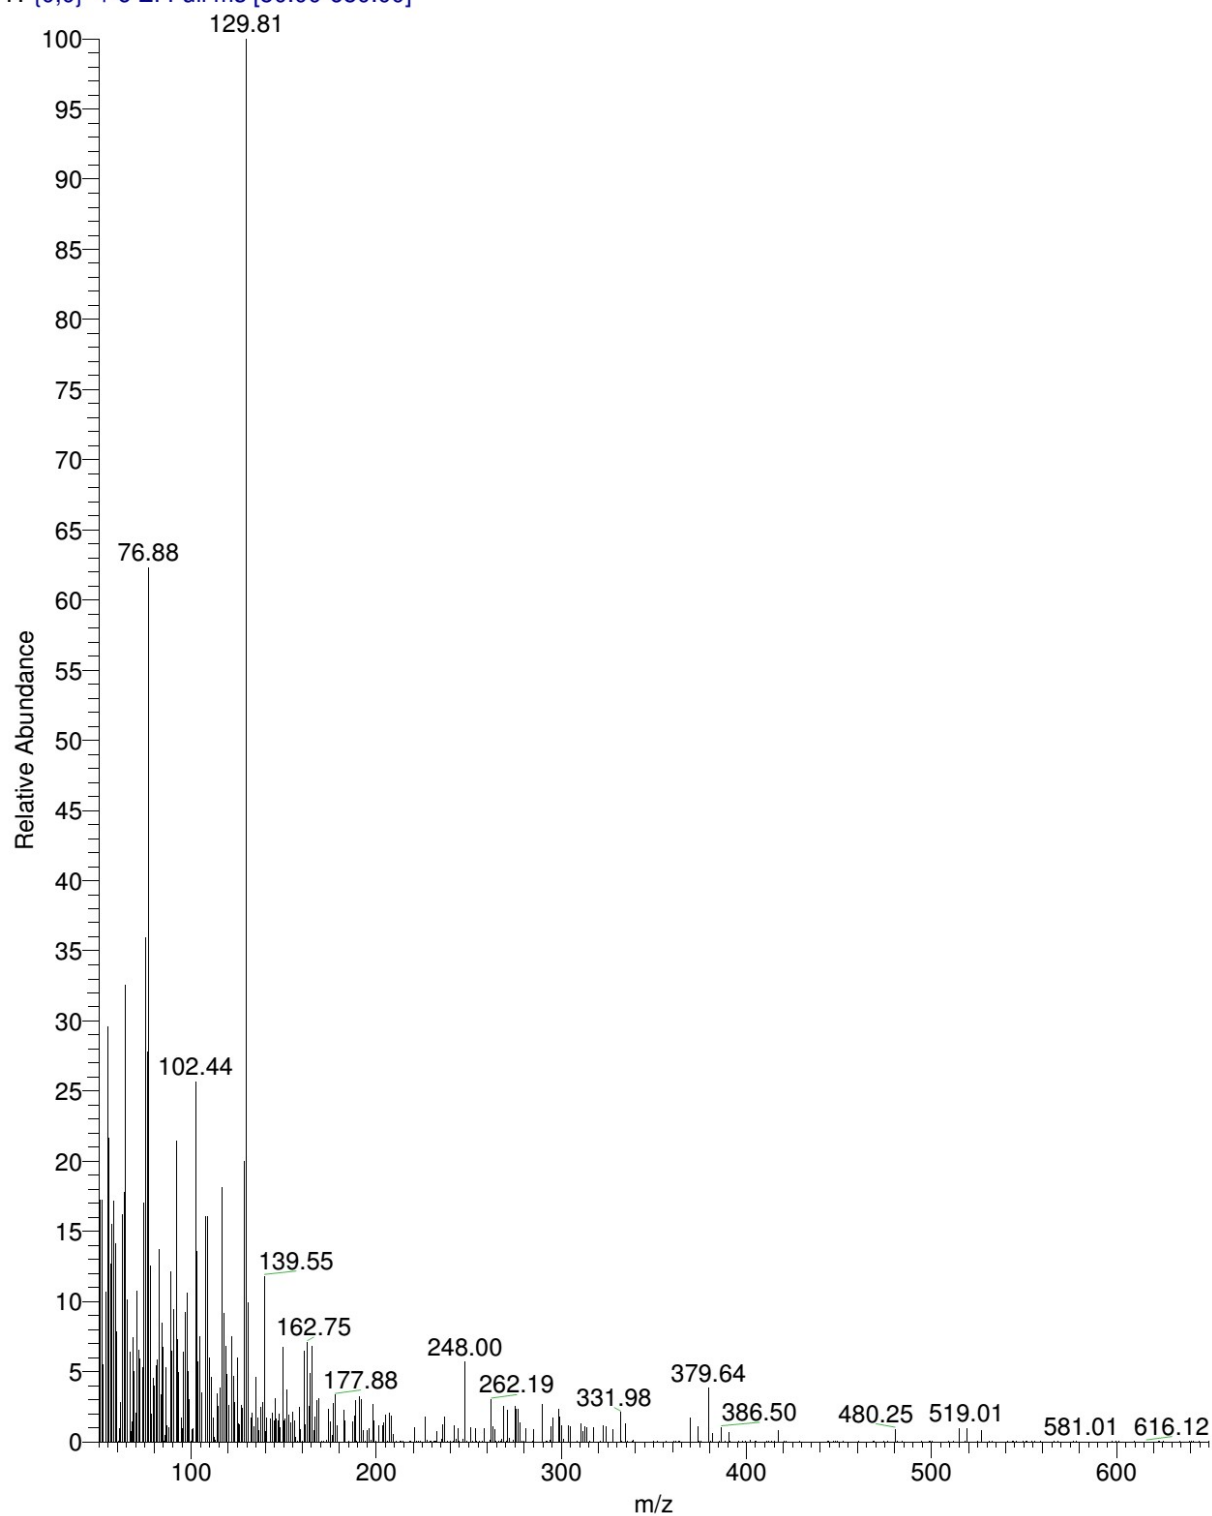

Figure : Mass spectrum of compound 3a

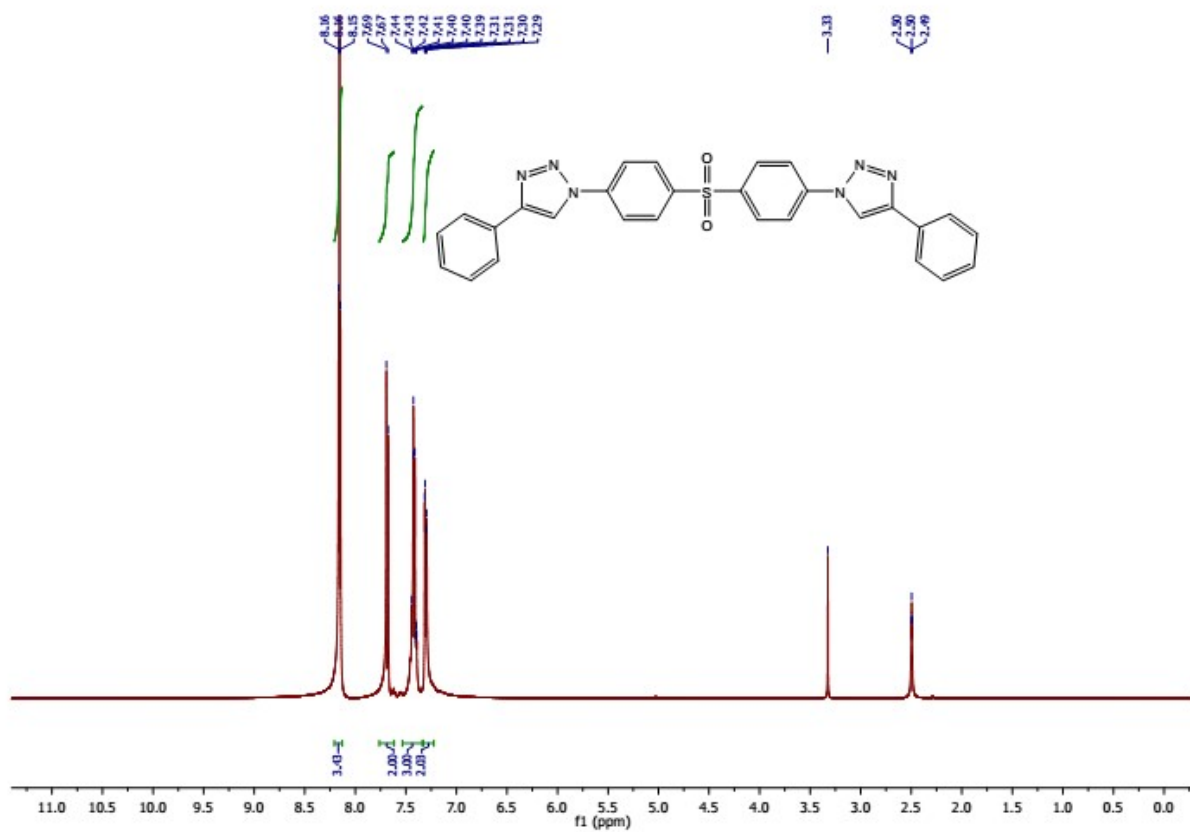

Figure : <sup>1</sup>H NMR of compound 3b



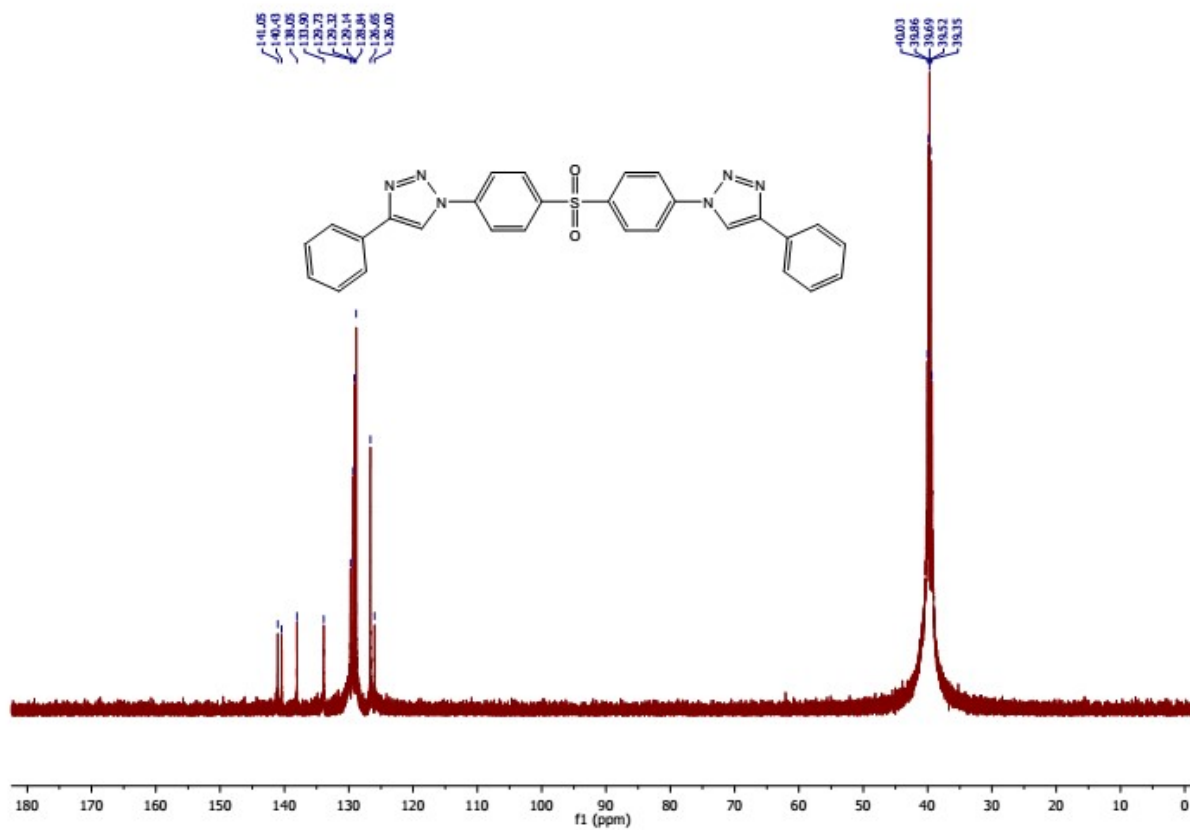

Figure : <sup>13</sup>C NMR of compound 3b

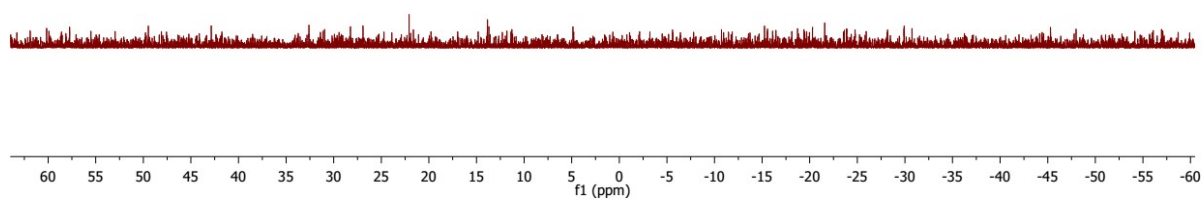

**Figure :  $^{13}\text{P}$  NMR of compound 3b**

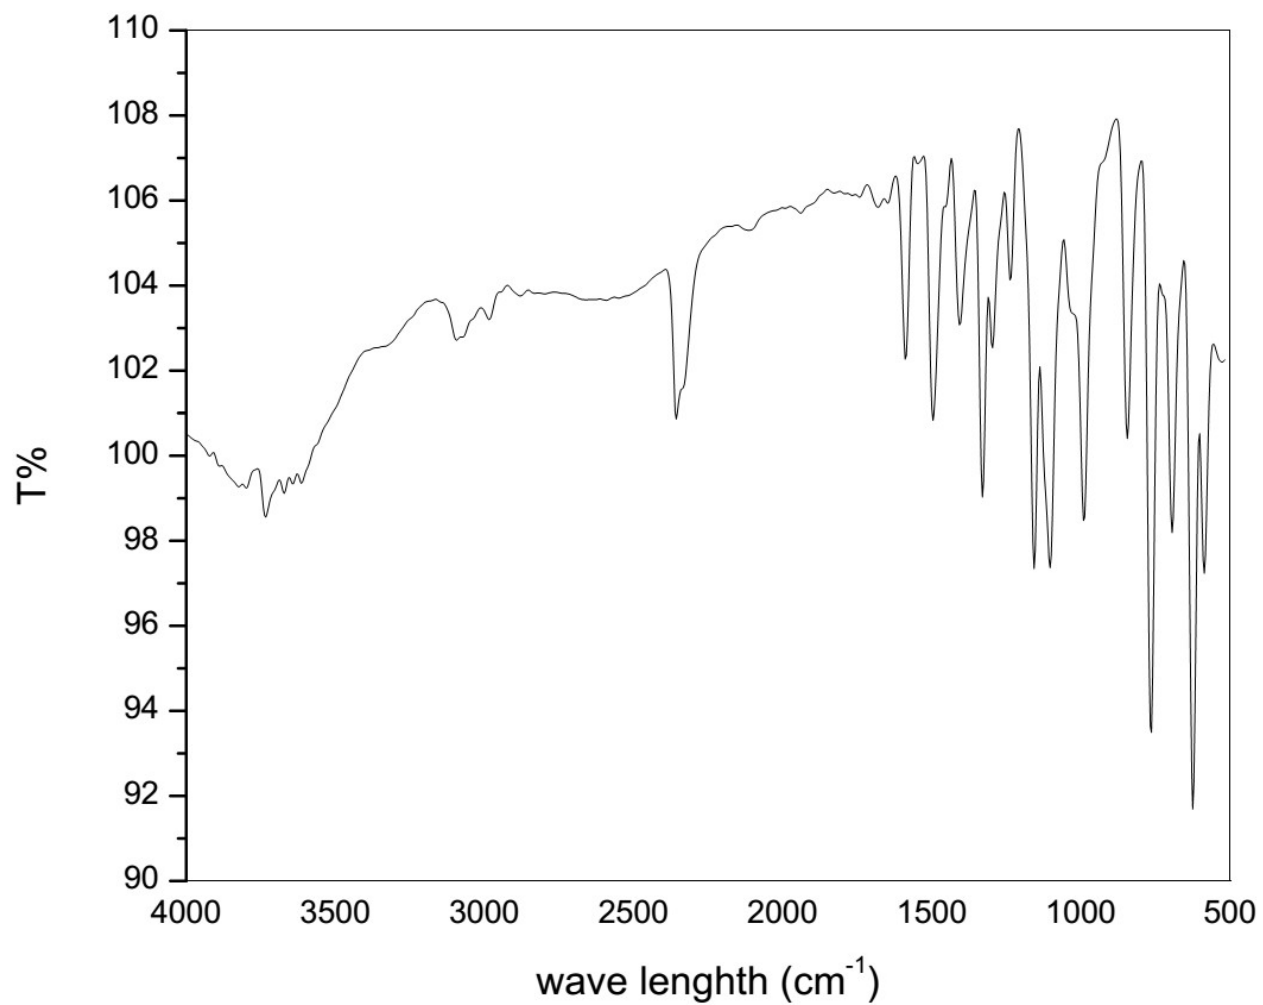

**Figure : IR chart of compound 3b**

Ewis-3b #364 RT: 1.27 AV: 1 NL: 3.84E4

T: {0,0} + c EI Full ms [50.00-650.00]

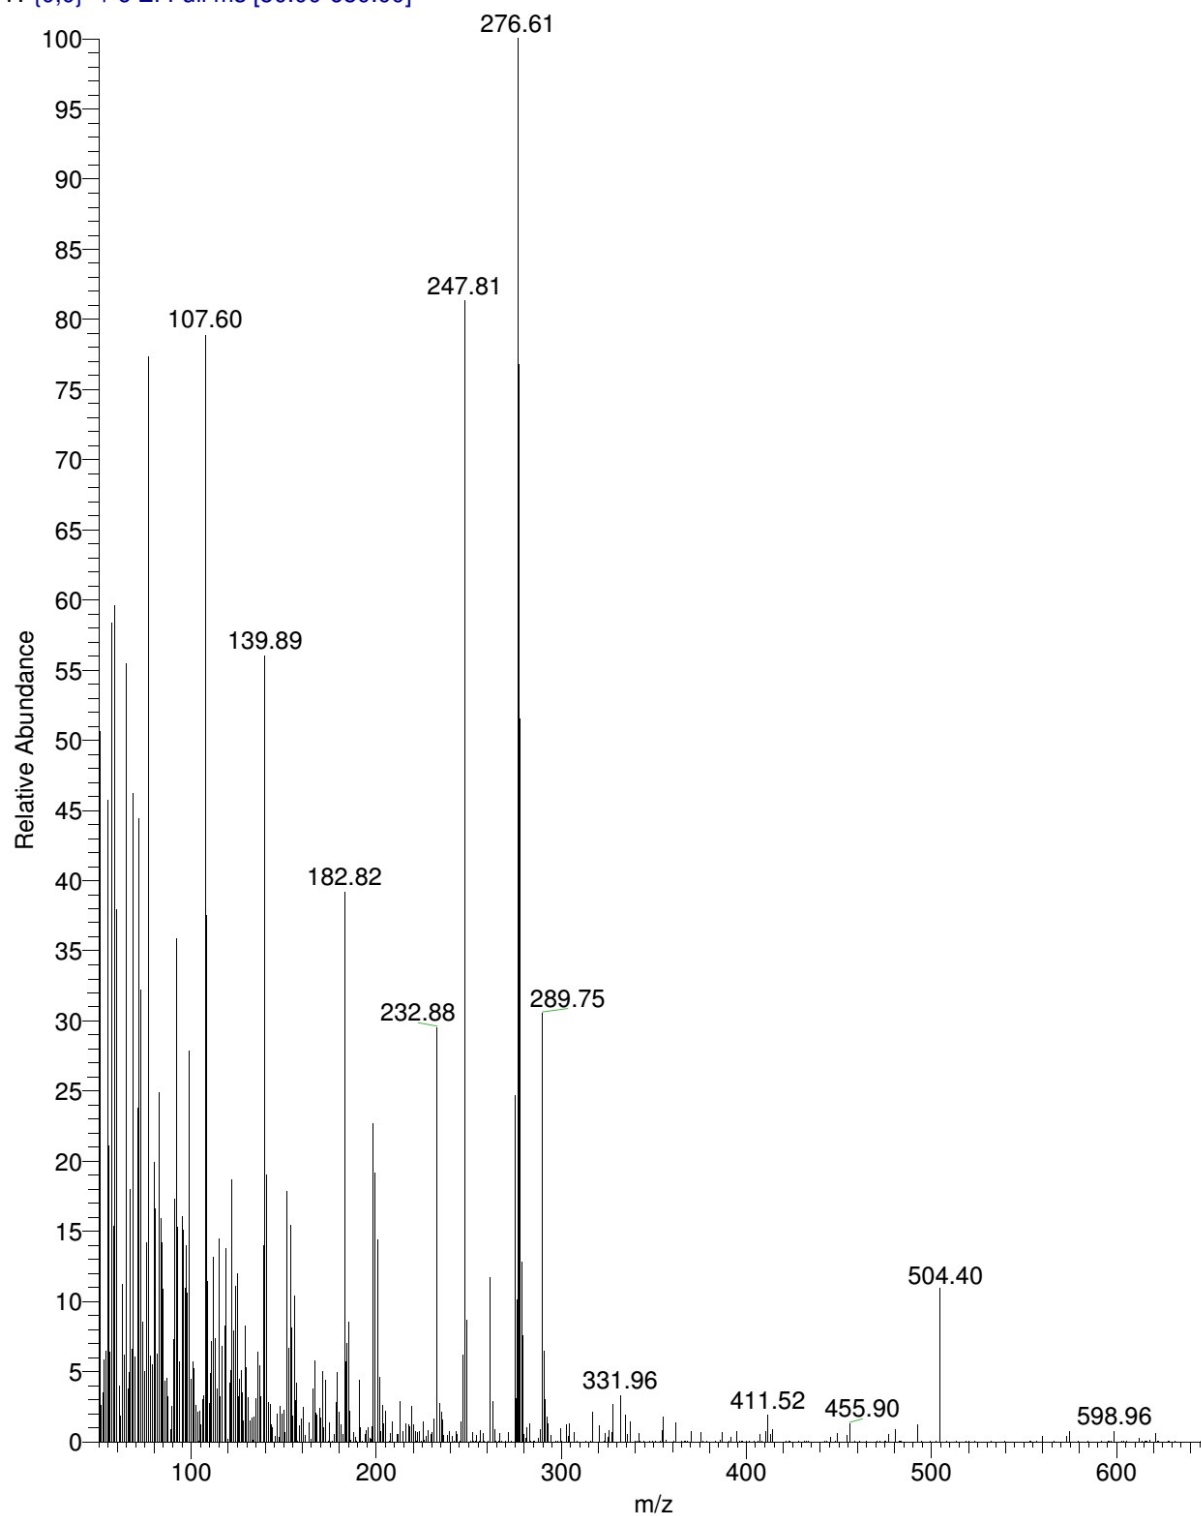**Figure : Mass spectrum of compound 3b**

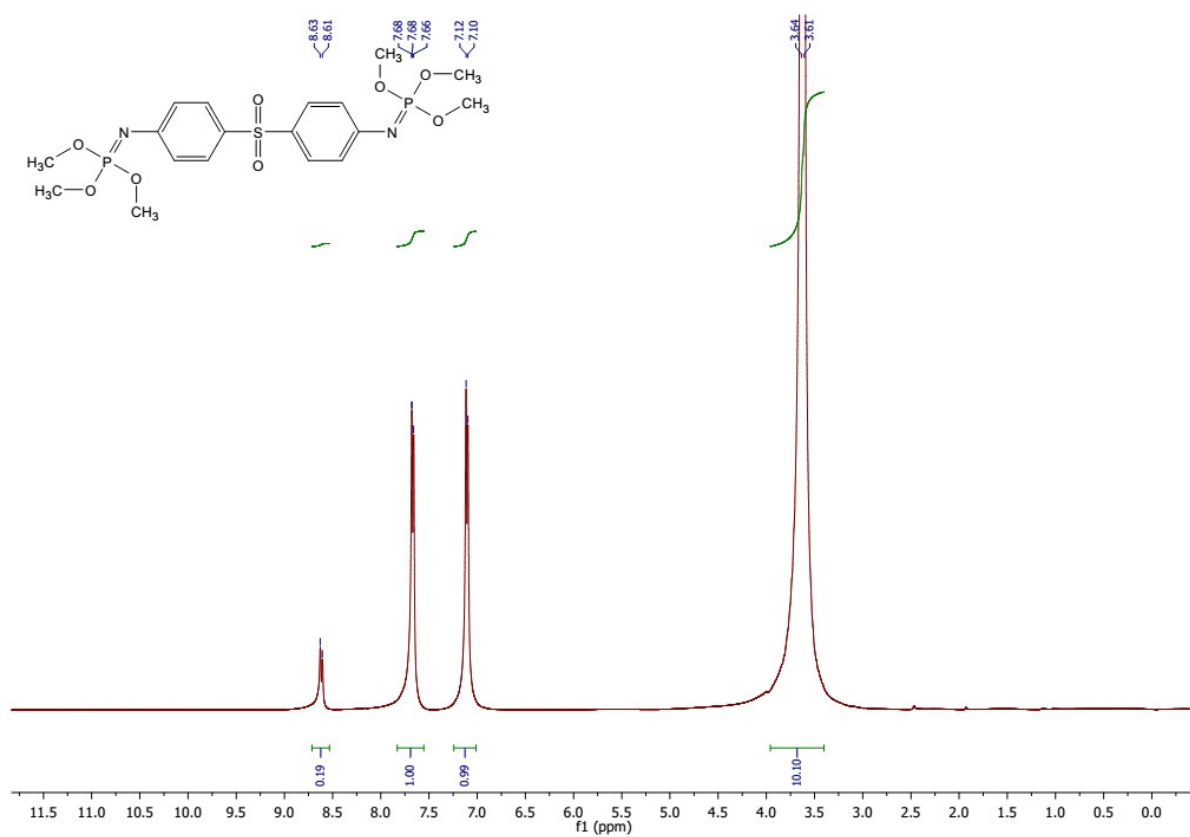

**Figure : <sup>1</sup>H NMR of compound 5a**

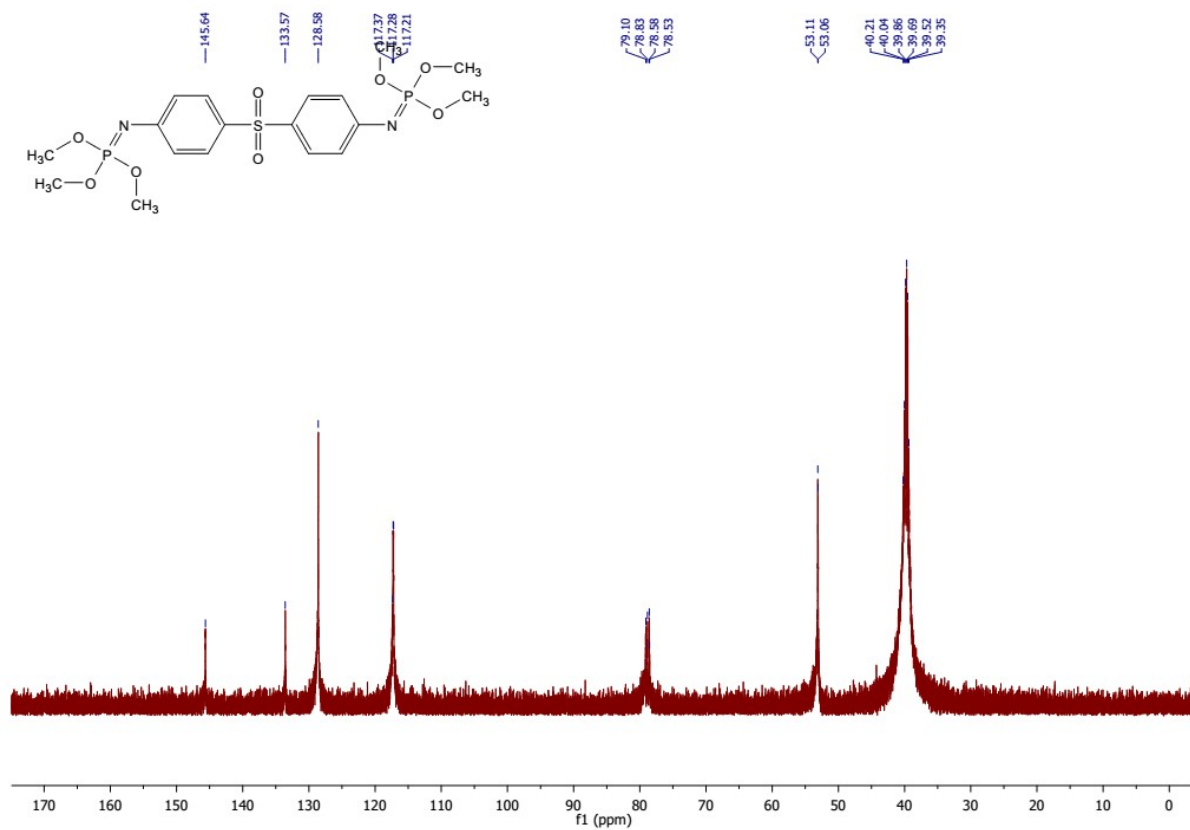

Figure : <sup>13</sup>C NMR of compound 5a

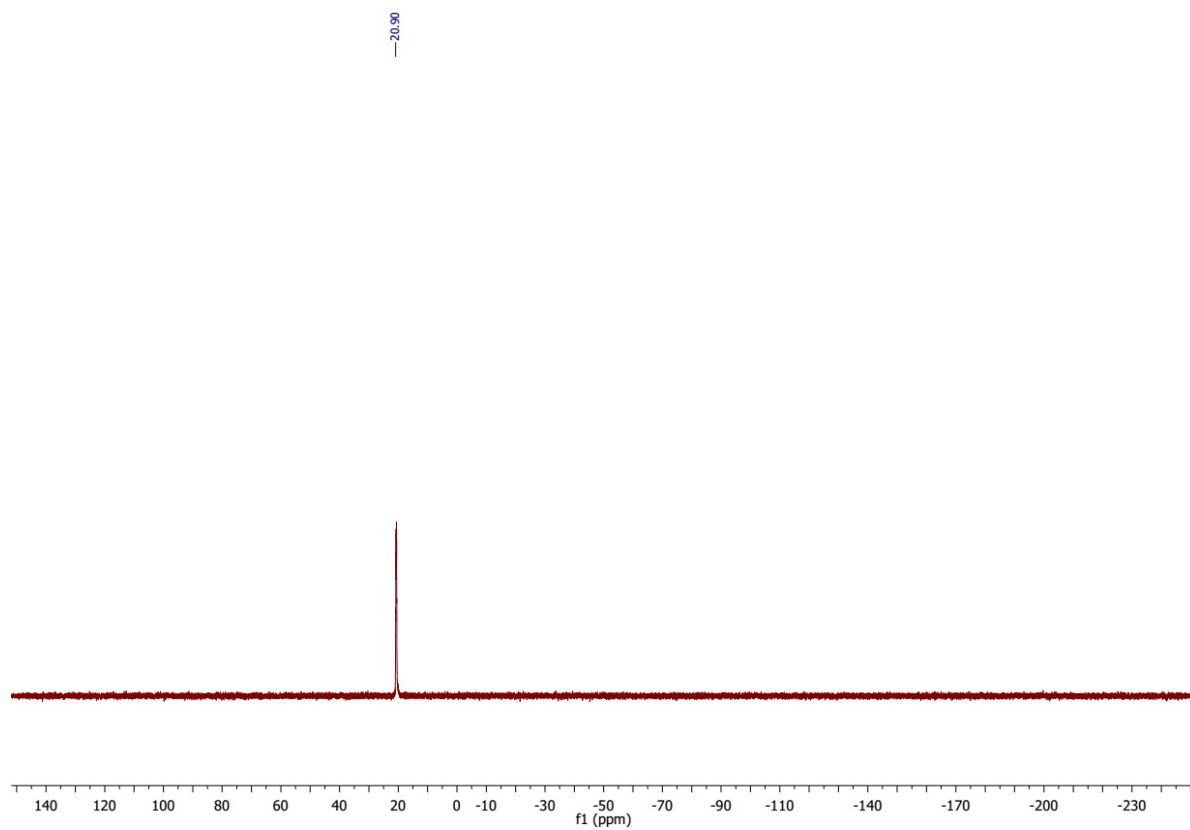

**Figure :  $^{13}\text{P}$  NMR of compound 5a**

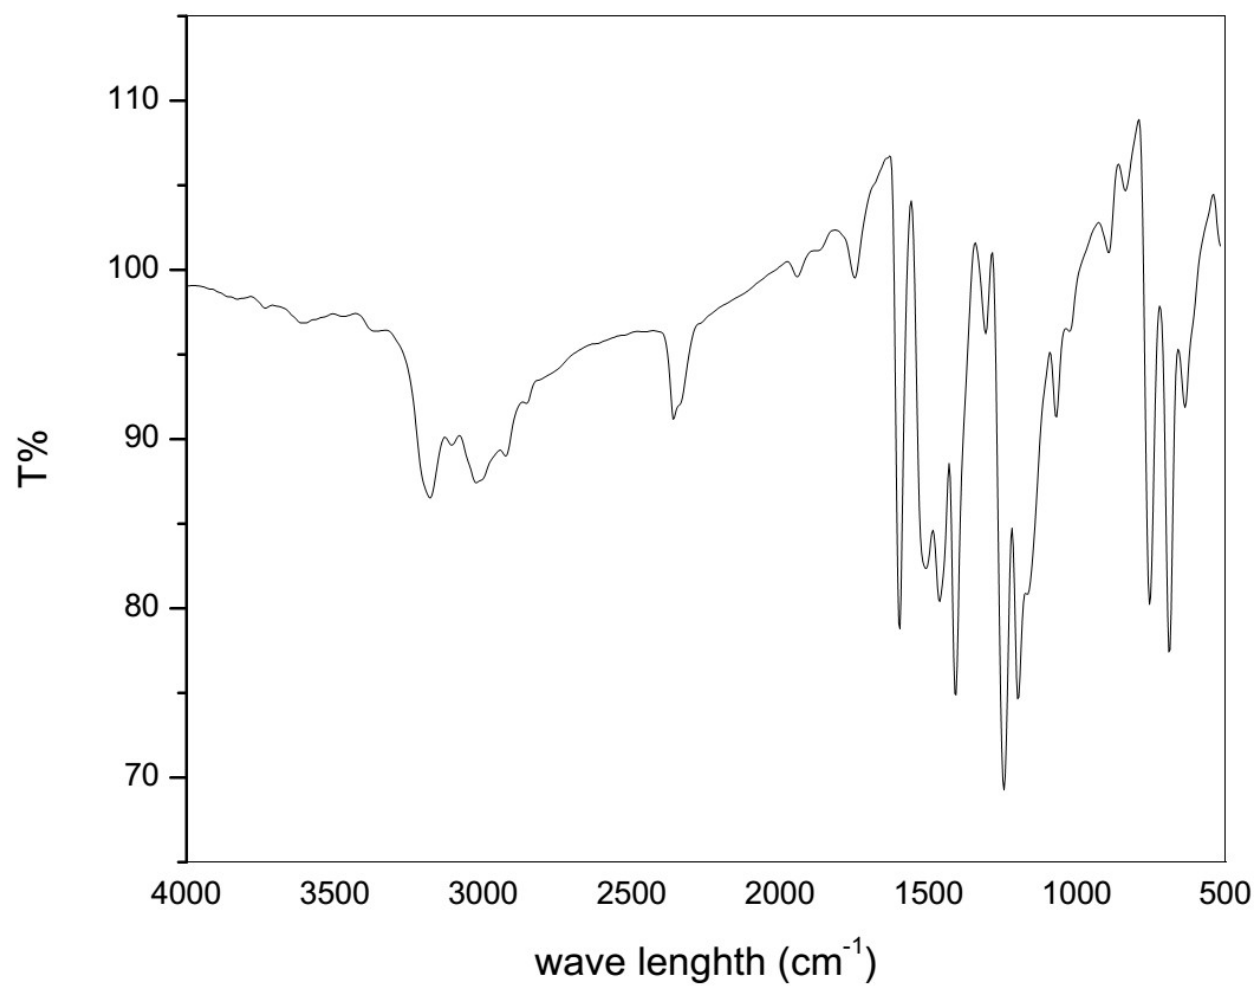

**Figure : IR chart of compound 5a**



Ewis-5a #745 RT: 2.56 AV: 1 NL: 1.03E4

T: {0,0} + c EI Full ms [50.00-650.00]

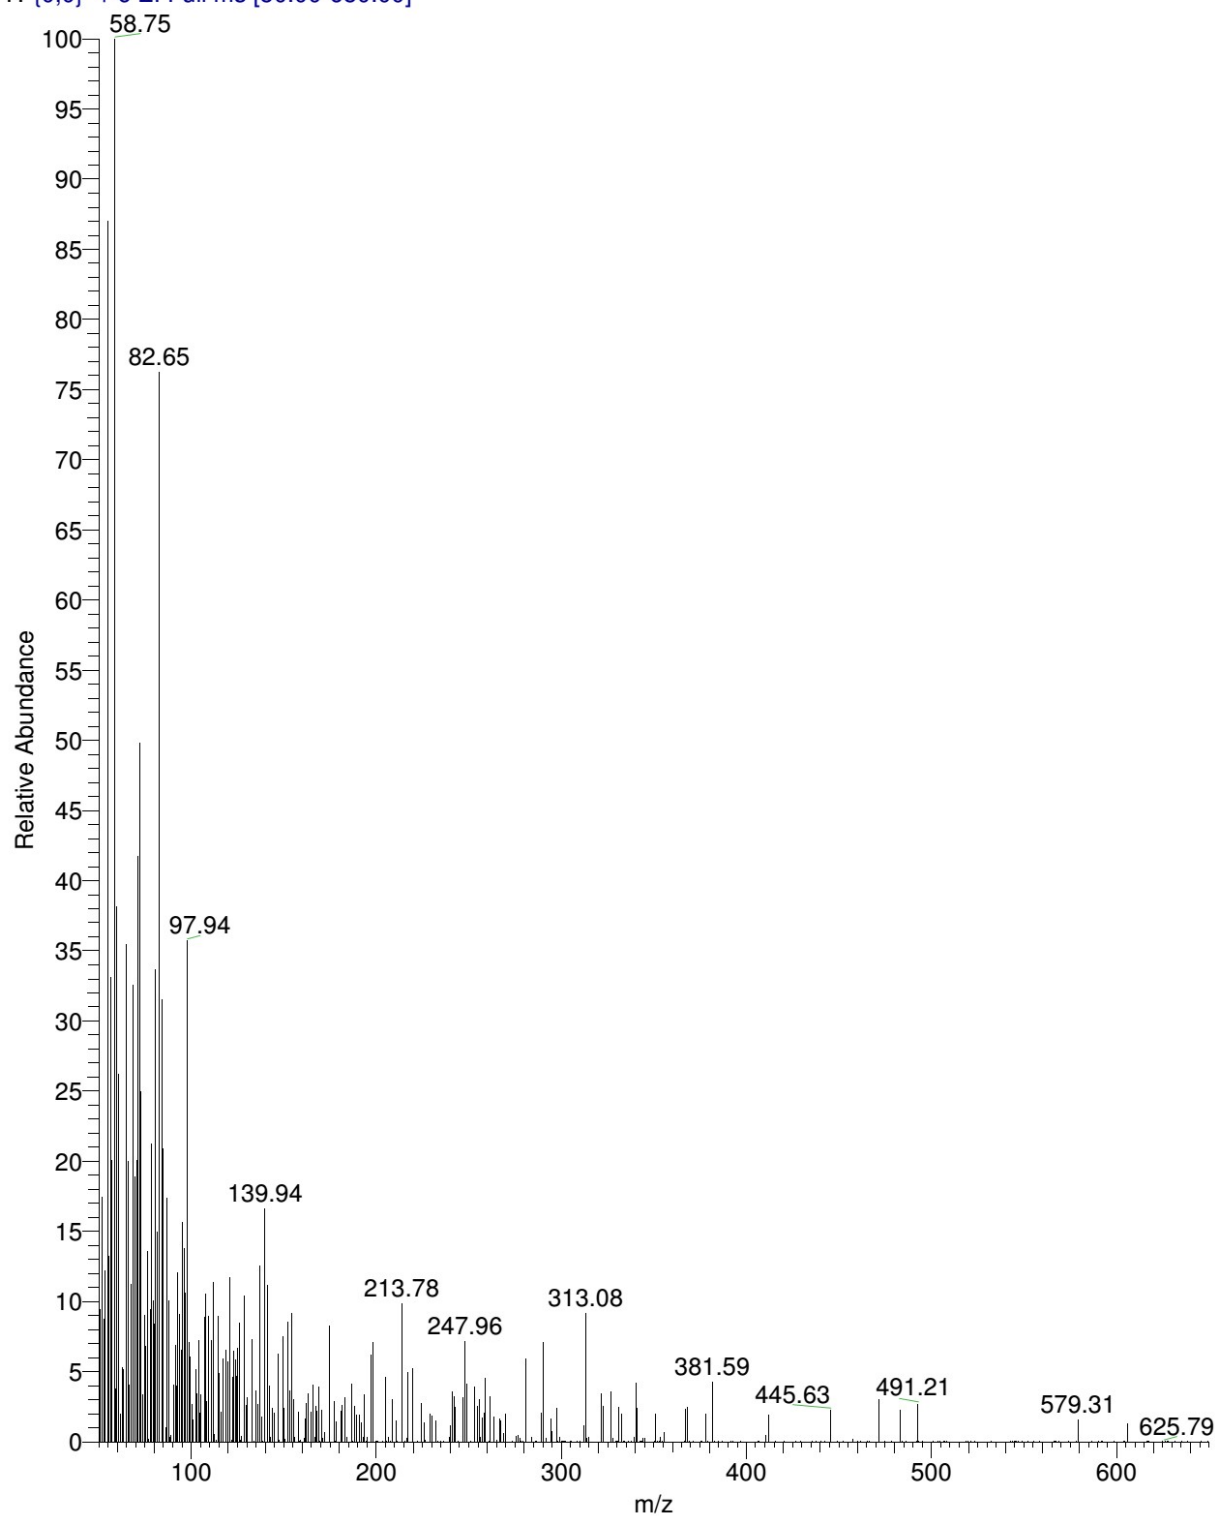**Figure : Mass spectrum of compound 5a**

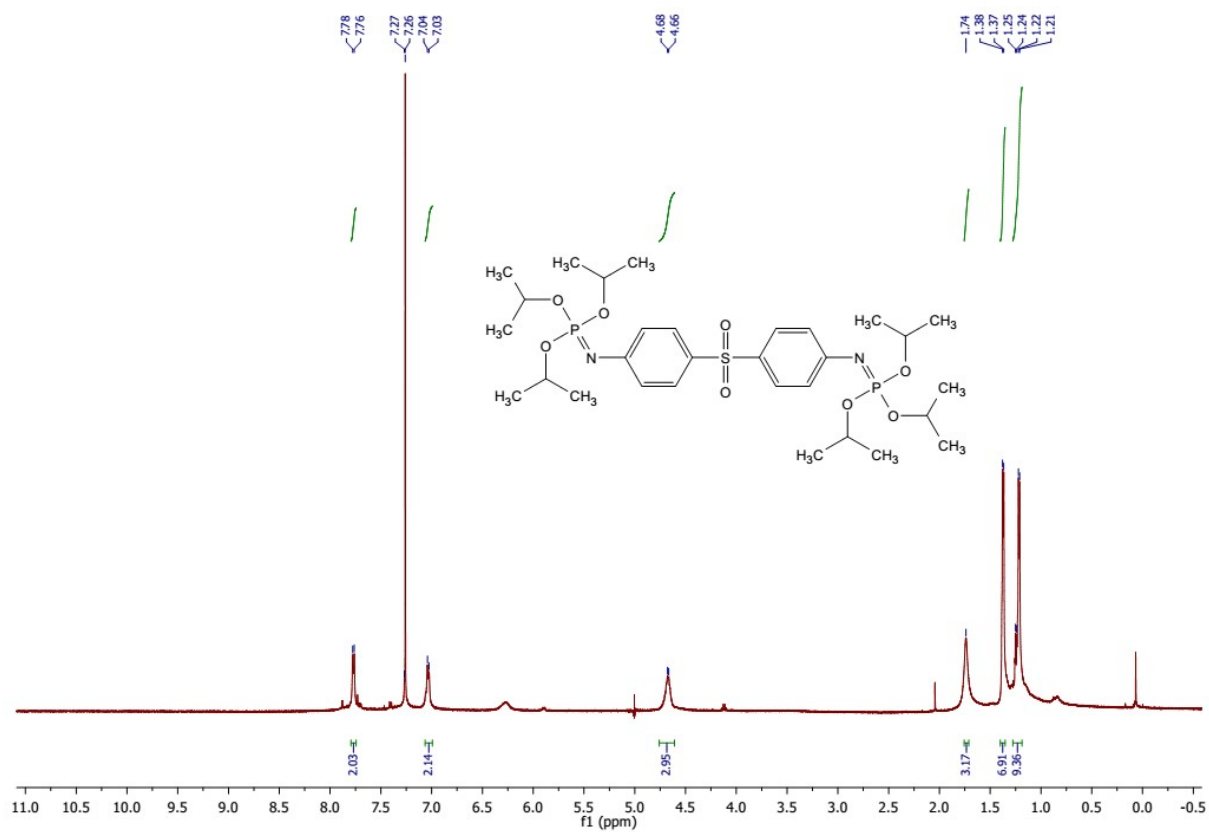

**Figure : <sup>1</sup>H NMR of compound 5b**

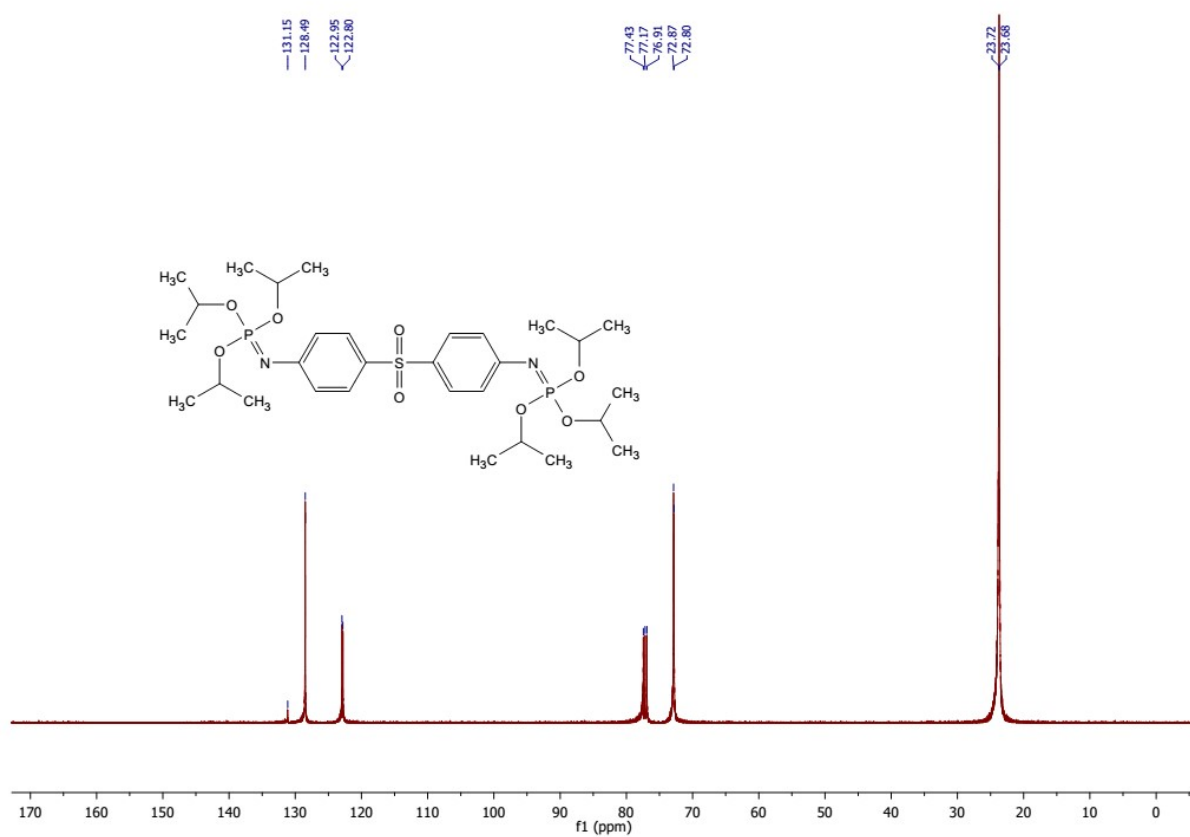

**Figure : <sup>13</sup>C NMR of compound 5b**

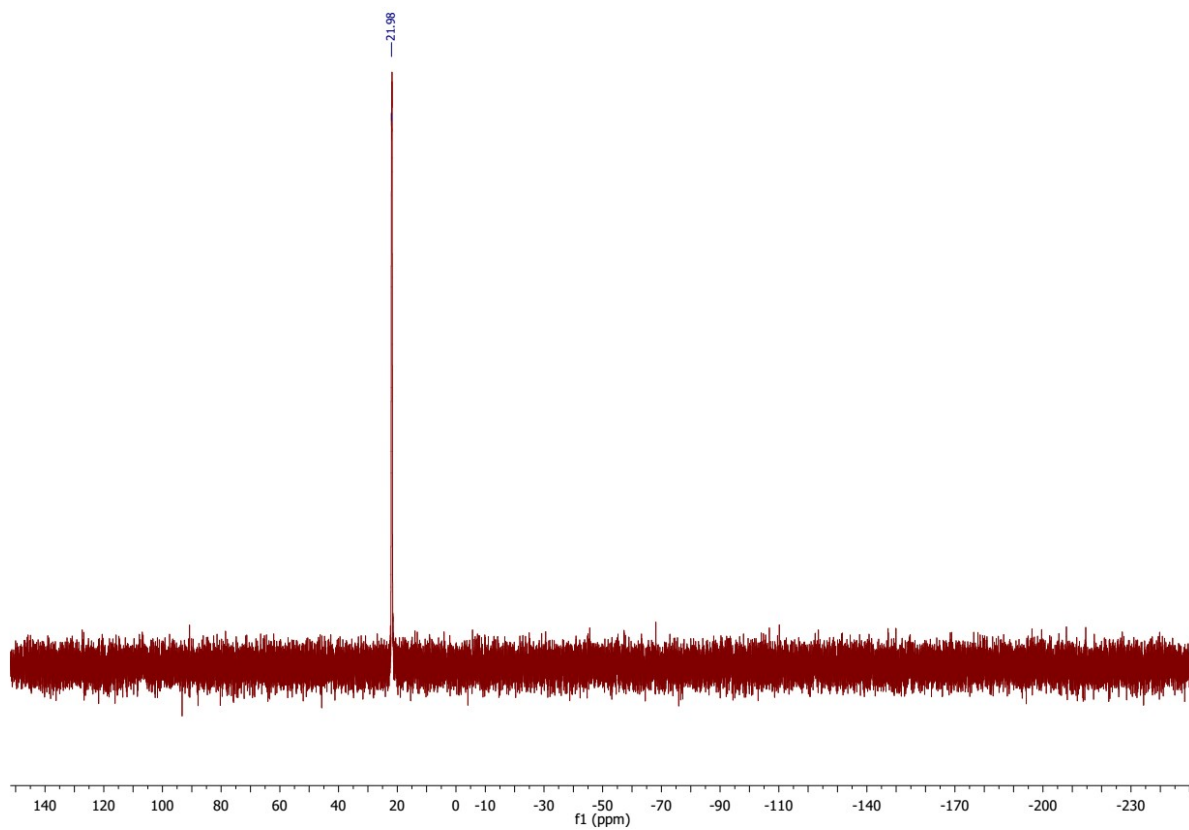

**Figure :  $^{13}\text{P}$  NMR of compound 5b**

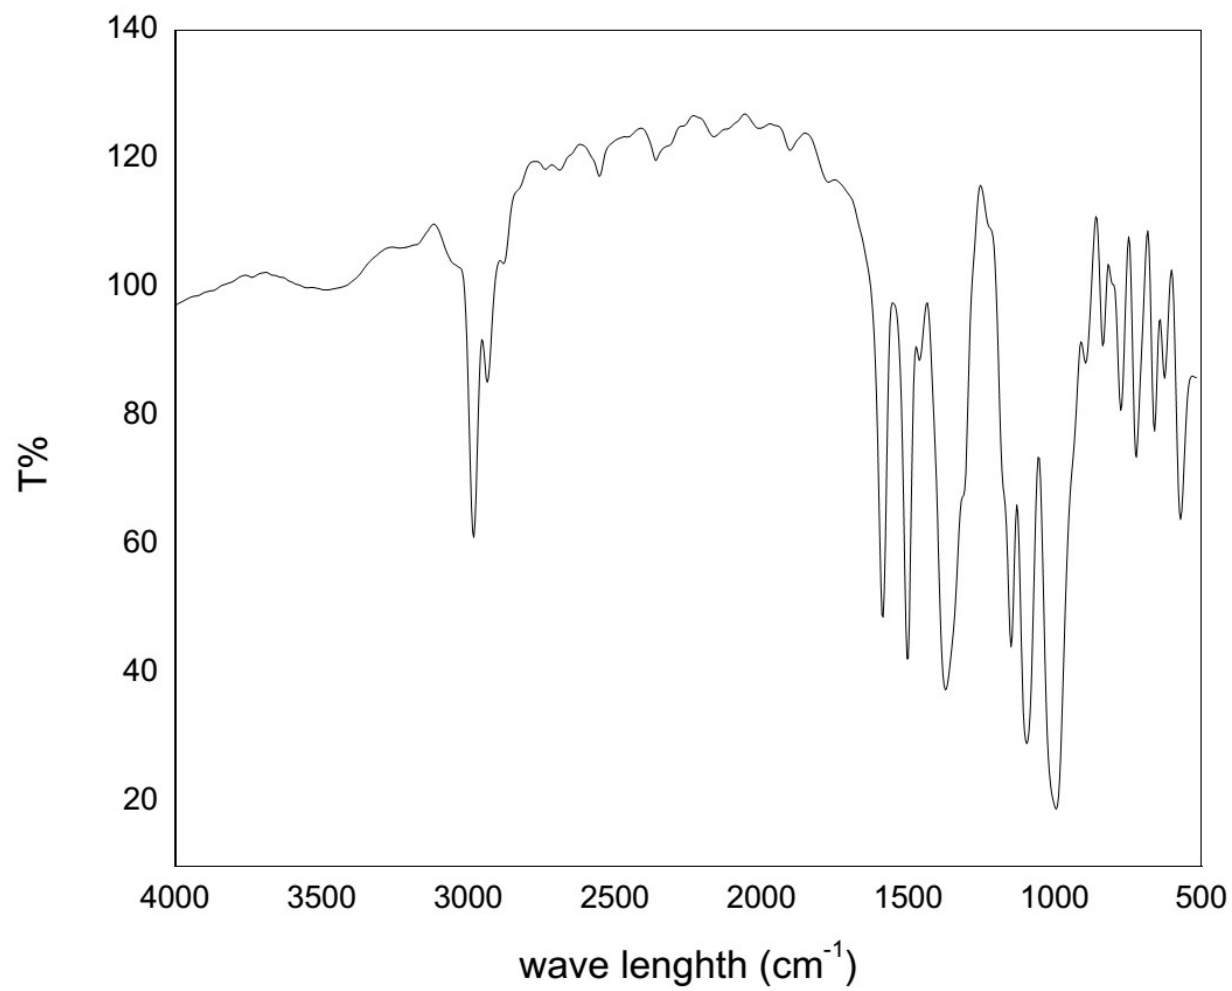

**Figure : IR of compound 5b**

Ewis-5b\_250722101350 #830 RT: 2.85 AV: 1 NL: 6.09E4

T: {0,0} + c EI Full ms [50.00-700.00]

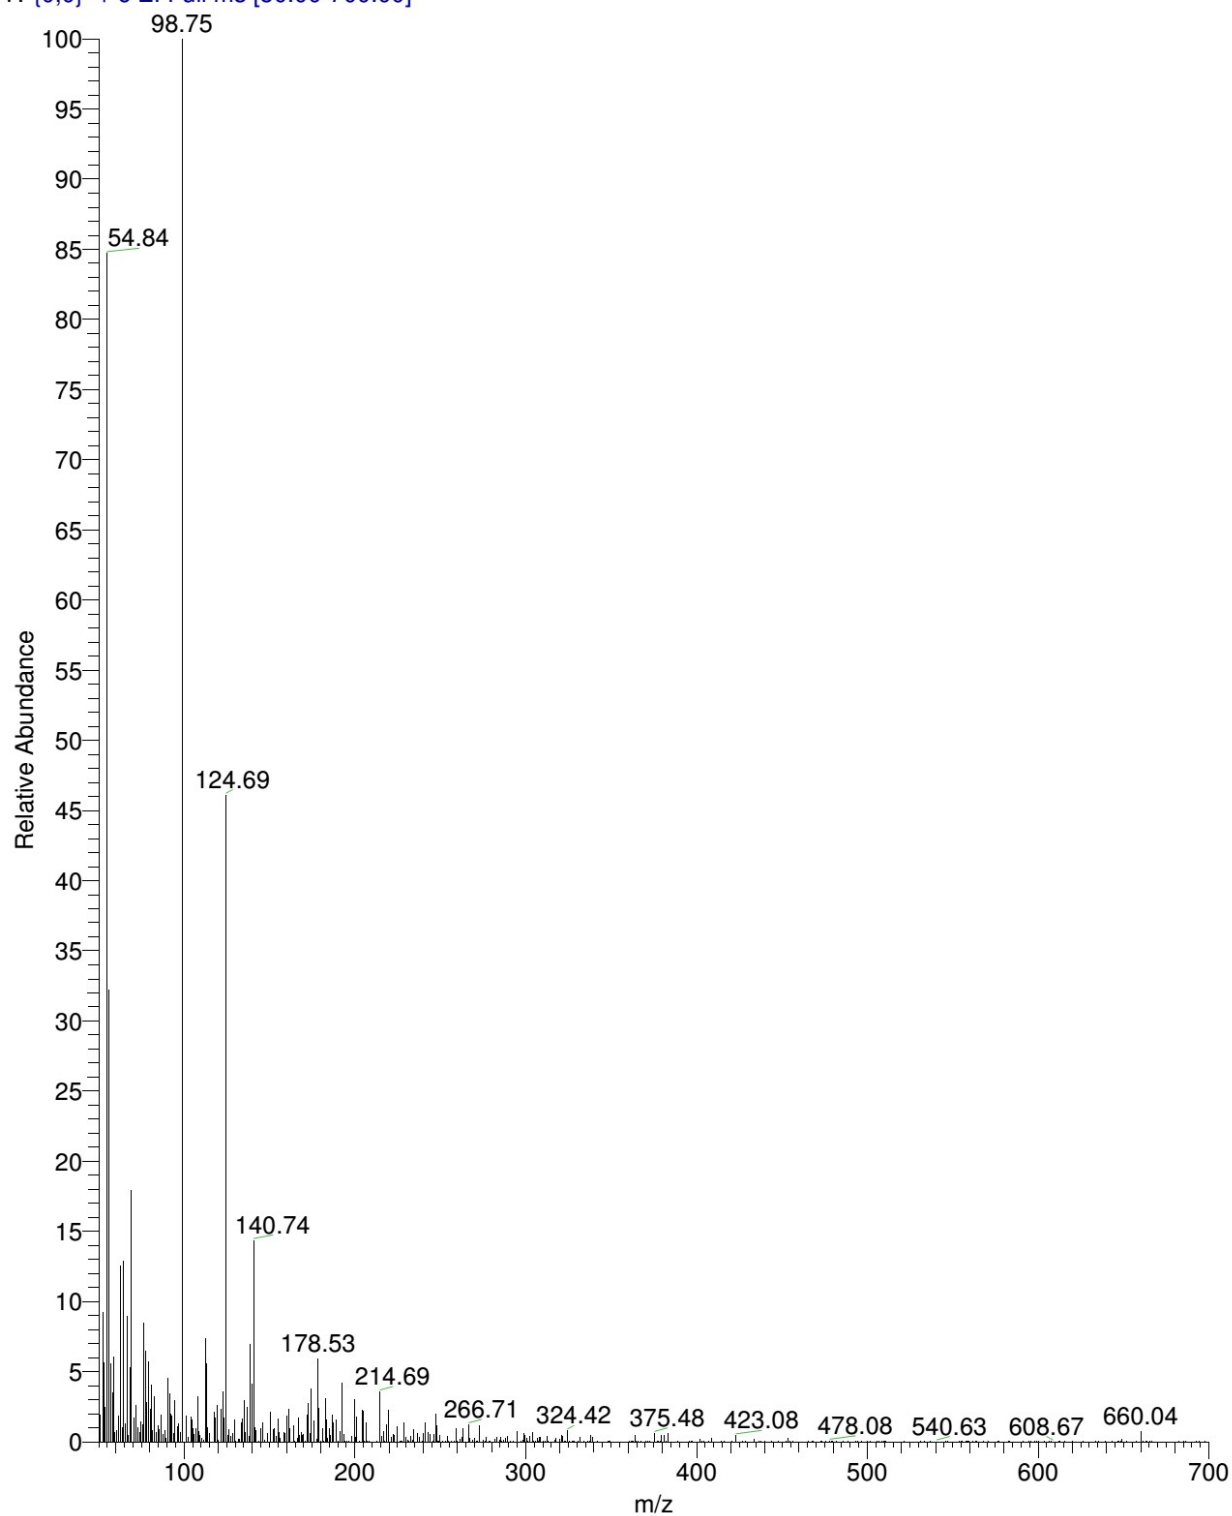

Figure : mass spectrum of compound 5b

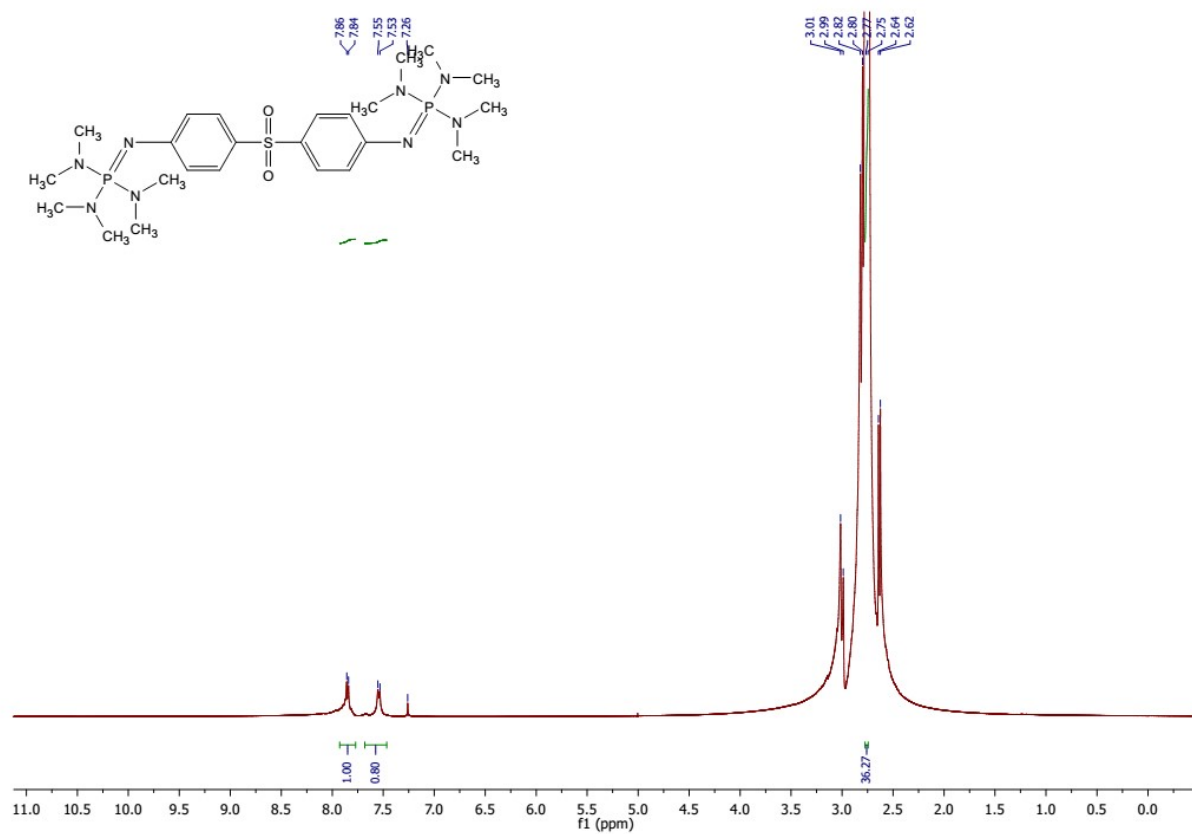

**Figure : <sup>1</sup>H NMR of compound 5c**

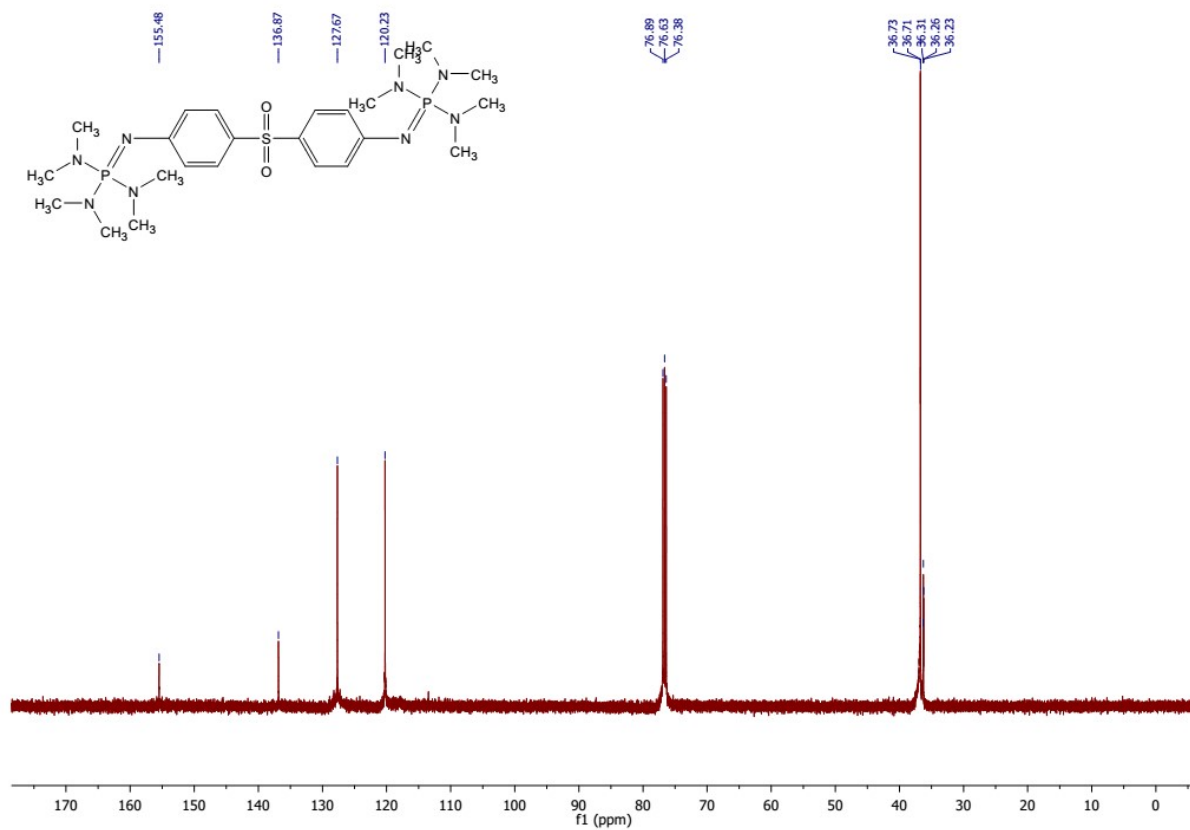

Figure : <sup>13</sup>C NMR of compound 5c



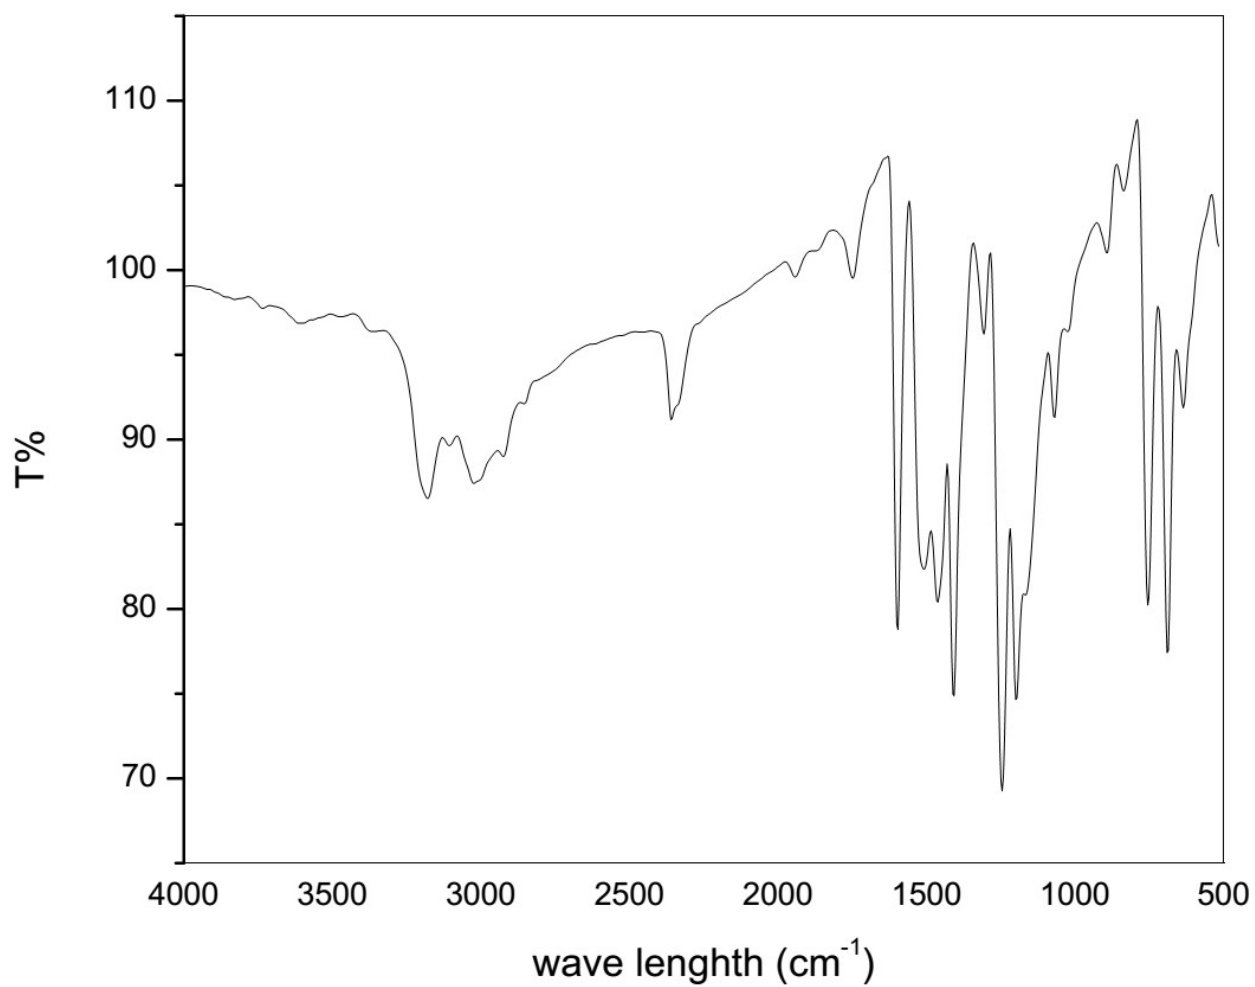

**Figure : IR chart of compound 5c**

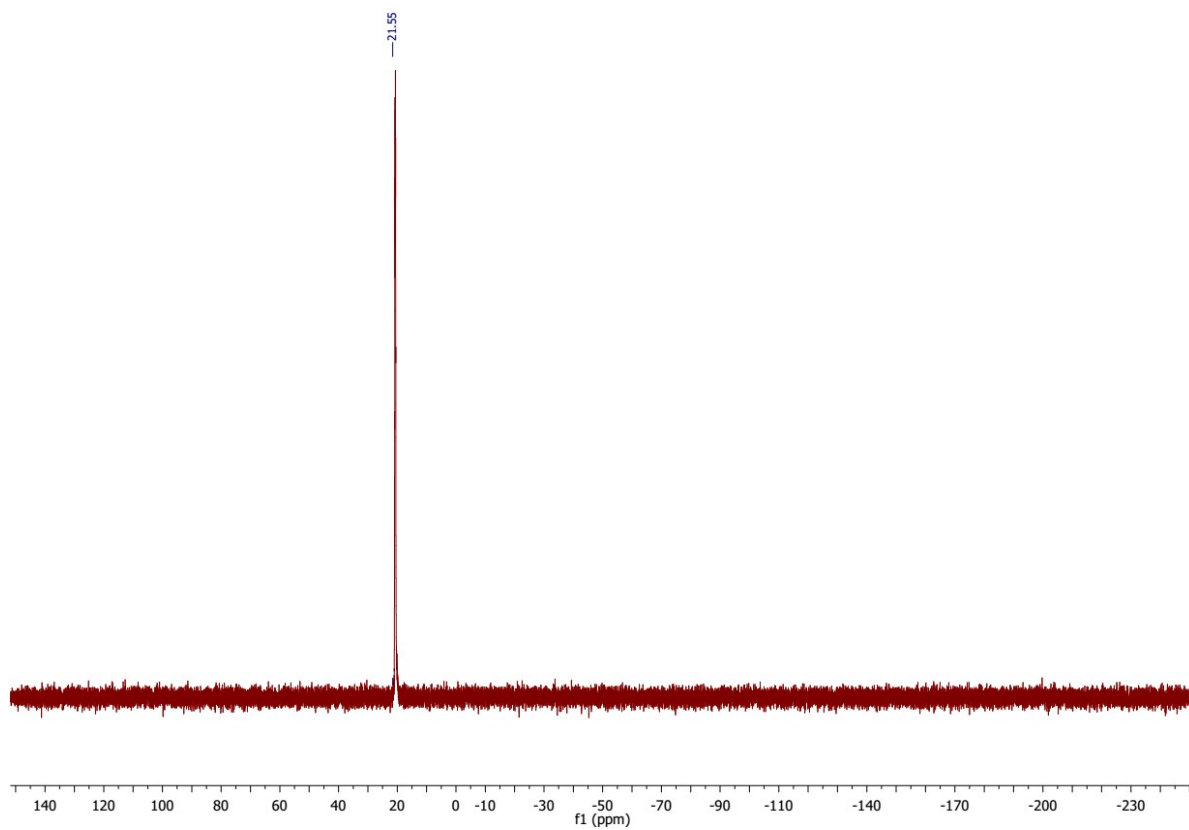

**Figure :  $^{13}\text{P}$  NMR of compound 5c**

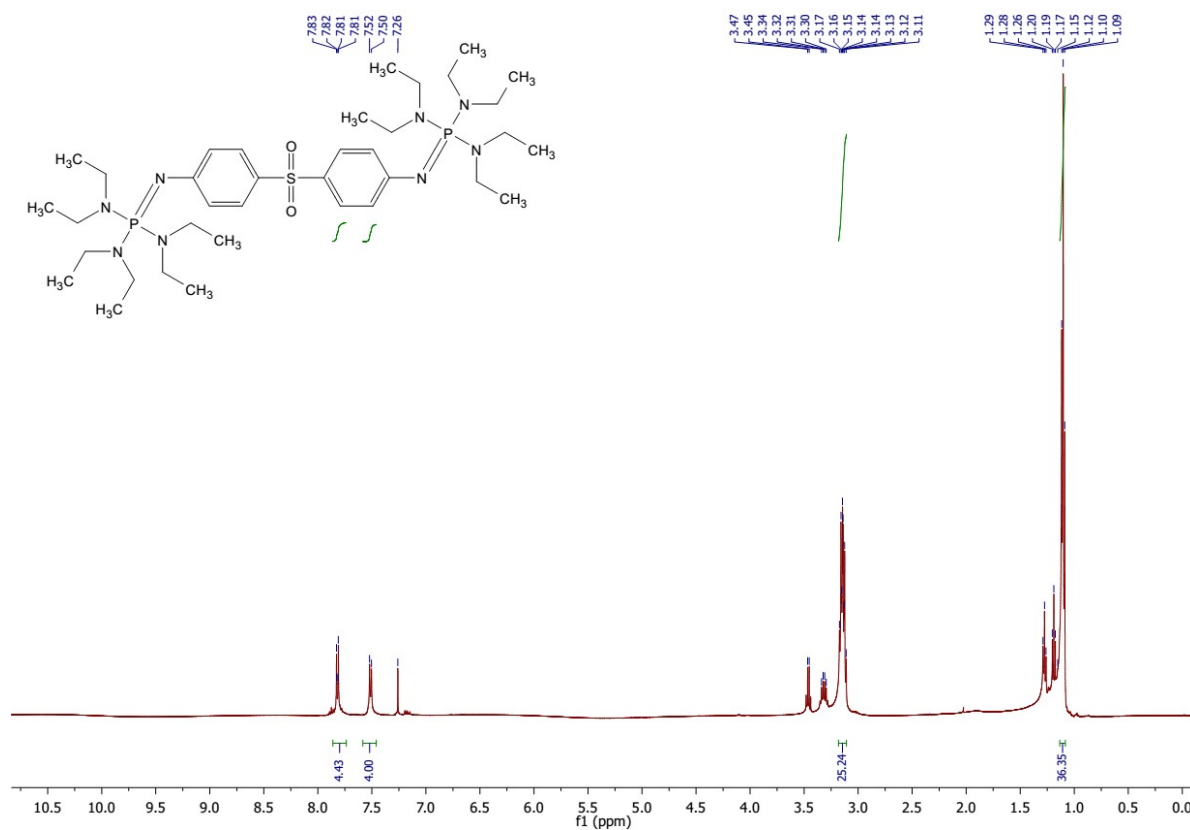

Figure : <sup>1</sup>H NMR of compound 5d

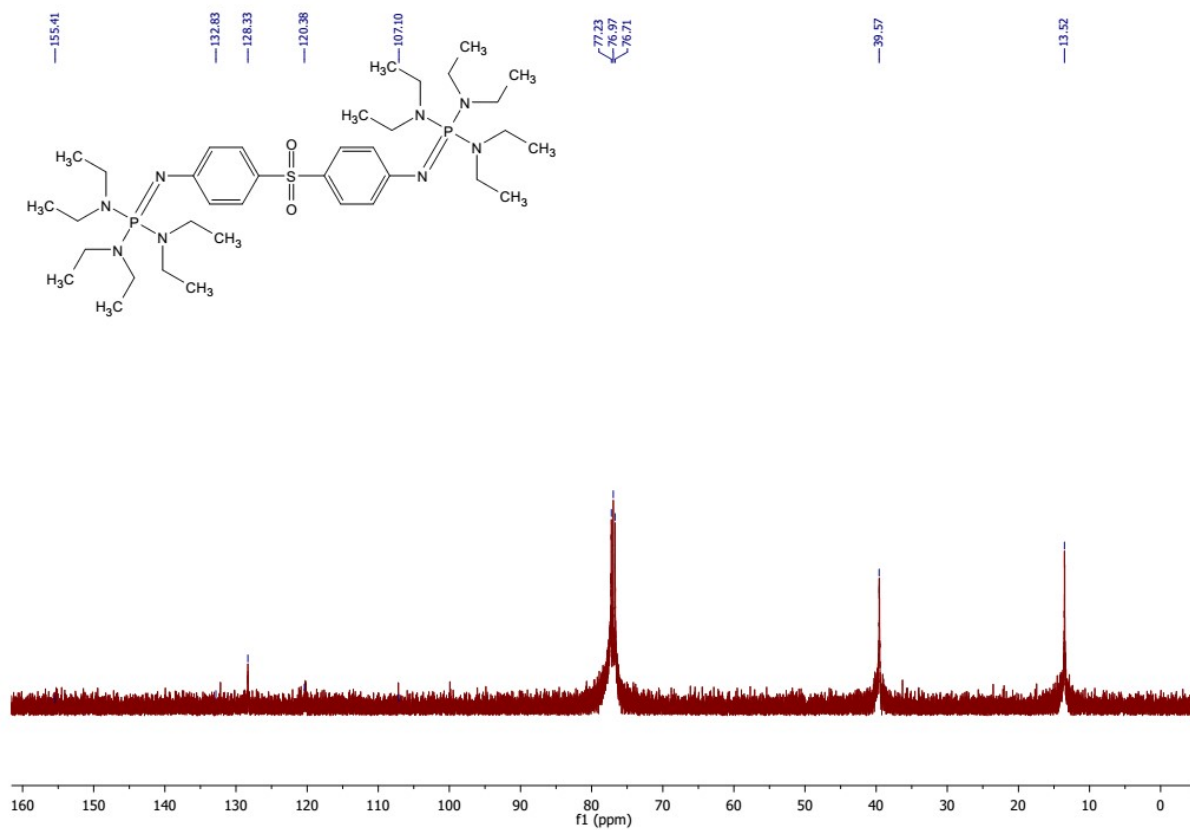

**Figure : <sup>13</sup>C NMR of compound 5d**

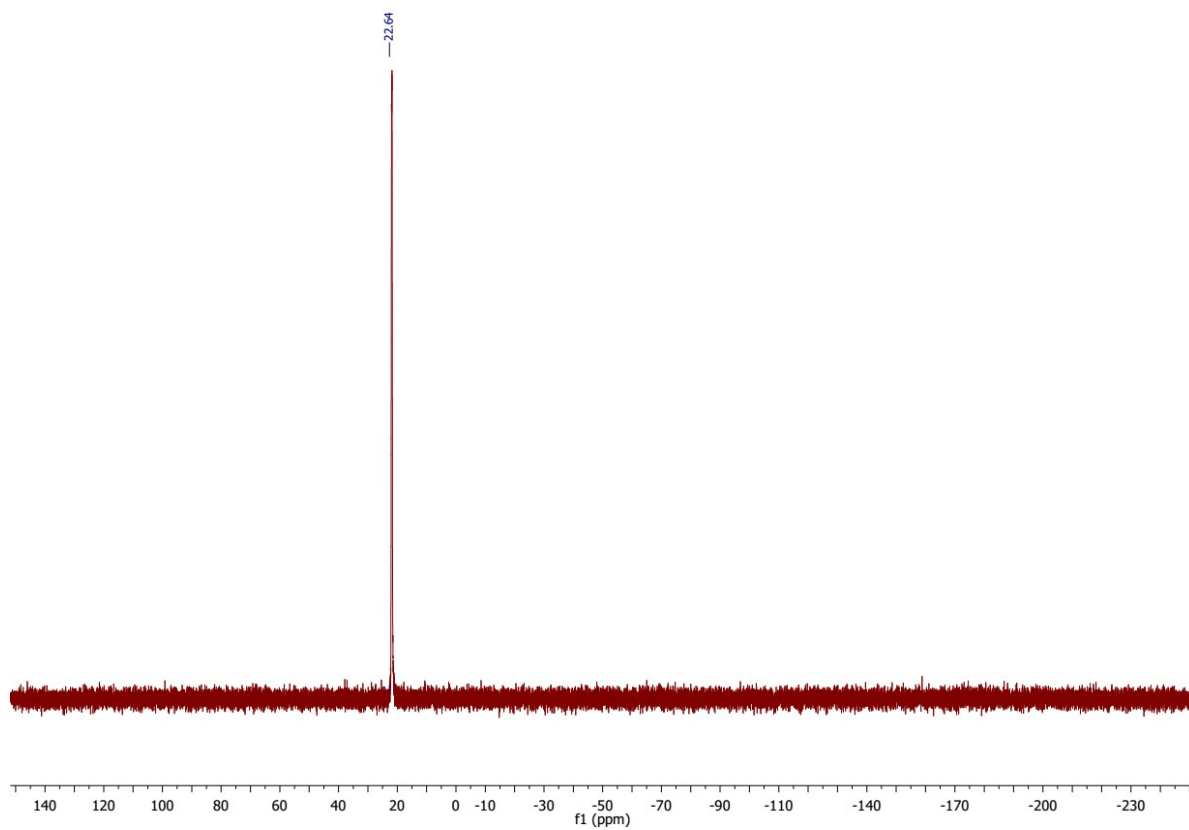

**Figure :  $^{13}\text{P}$  NMR of compound 5d**

Ewis-5d #1154 RT: 3.96 AV: 1 NL: 1.16E4

T: {0,0} + c EI Full ms [50.00-850.00]

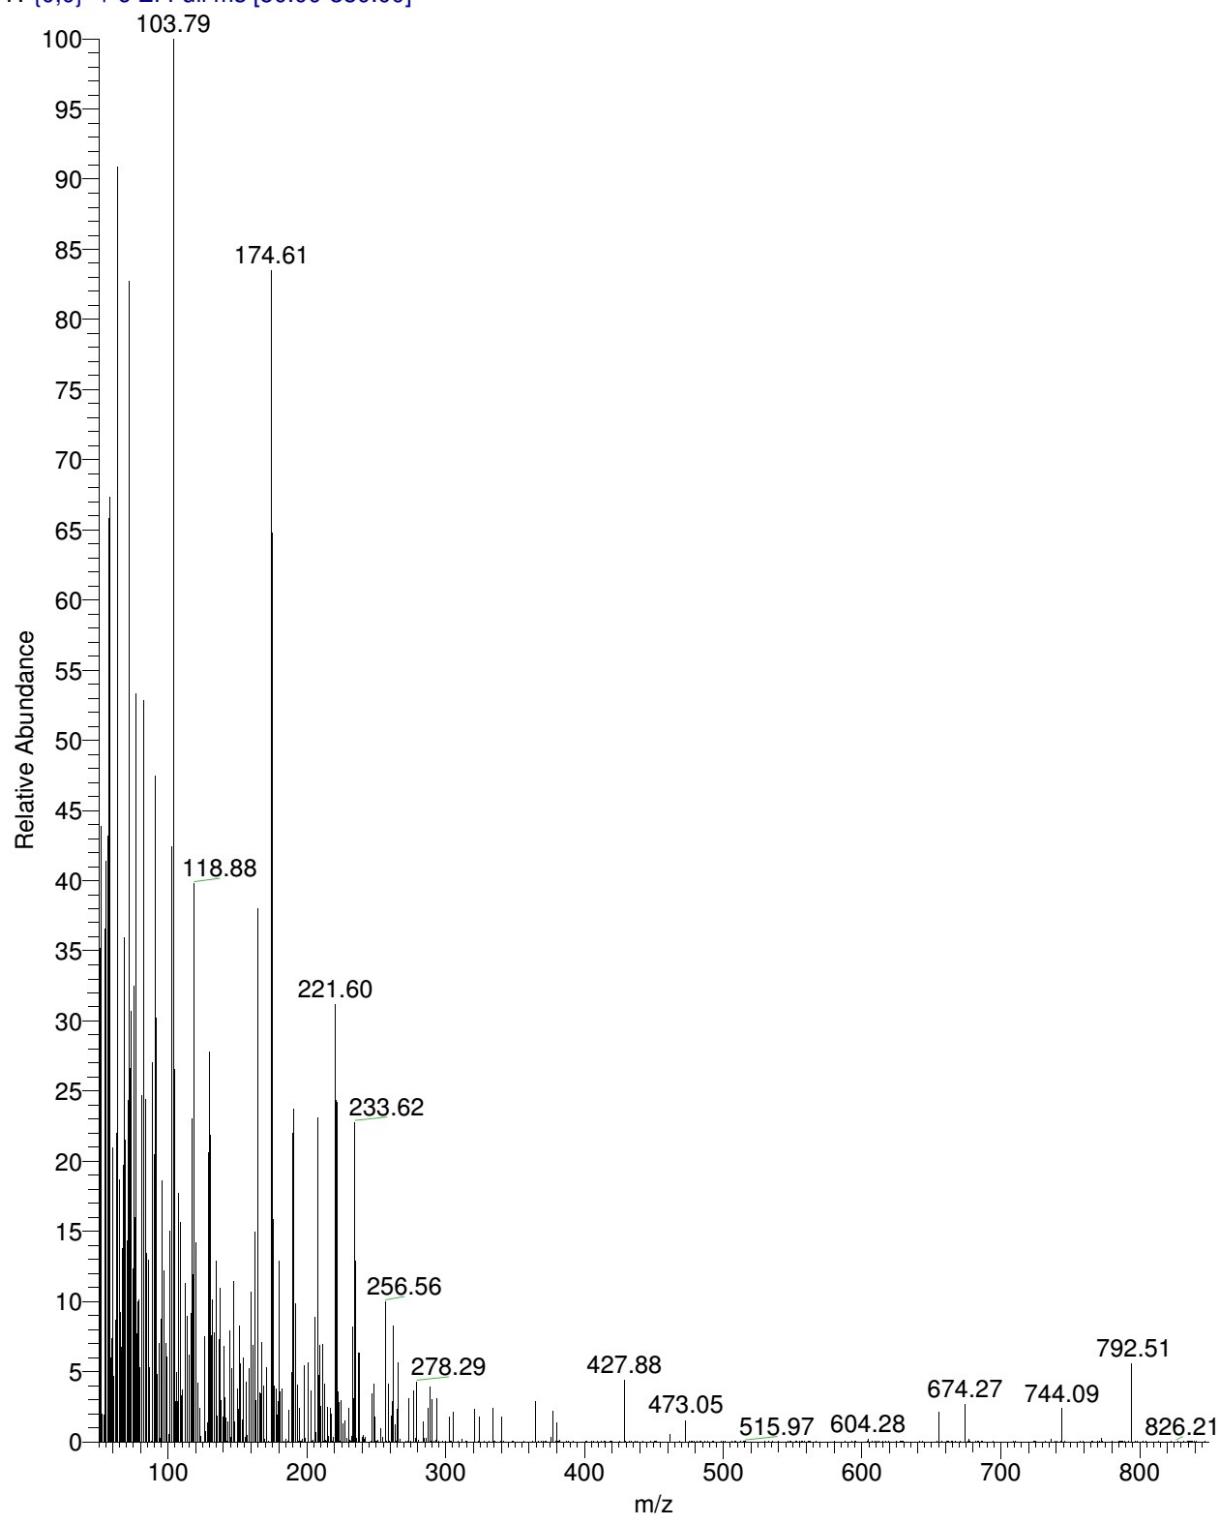

Figure : Mass spectrum of compound 5d

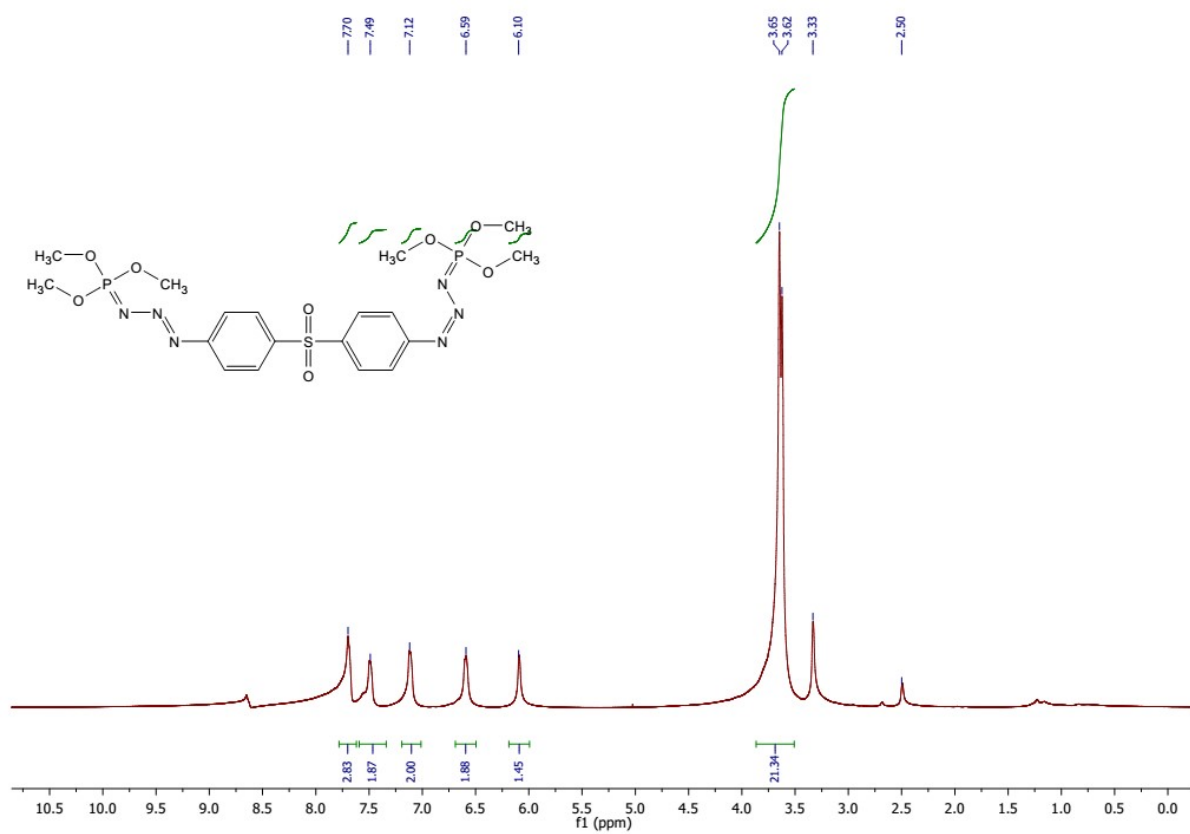

**Figure : <sup>1</sup>H NMR of compound 6a**

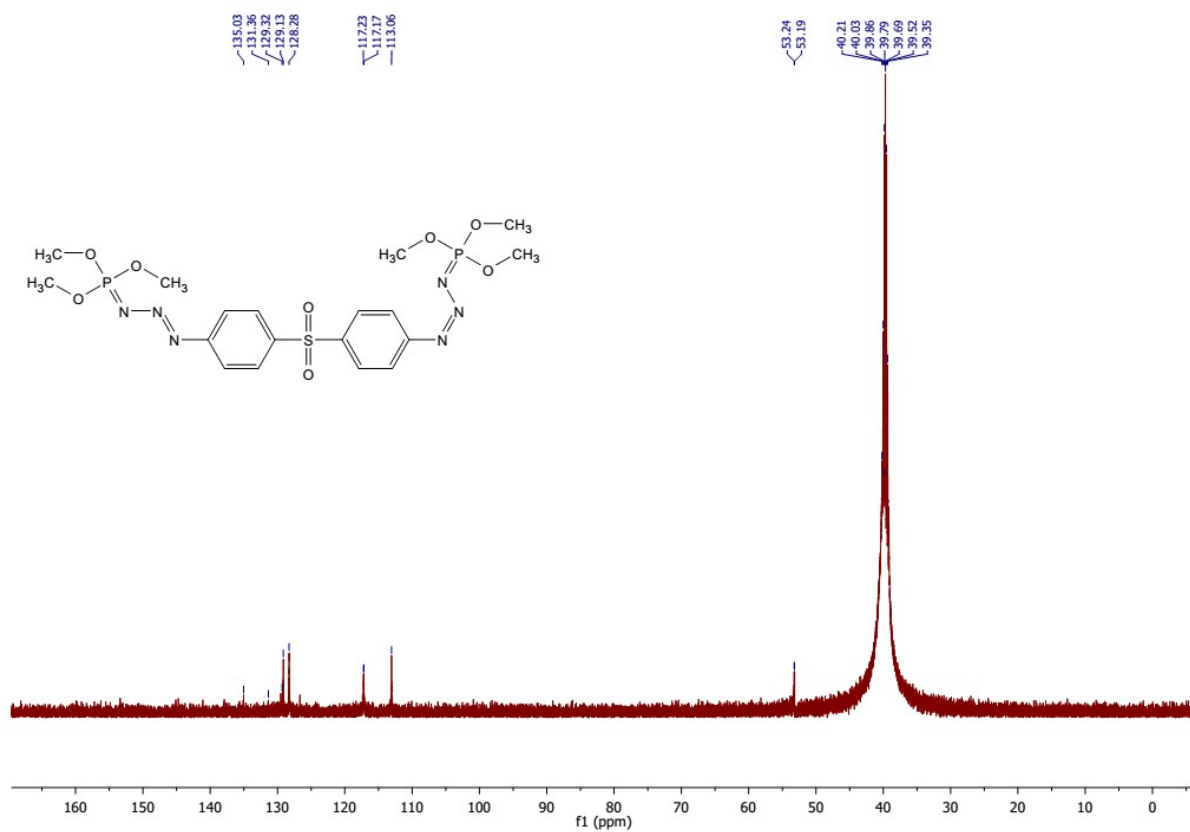

Figure : <sup>13</sup>C NMR of compound 6a



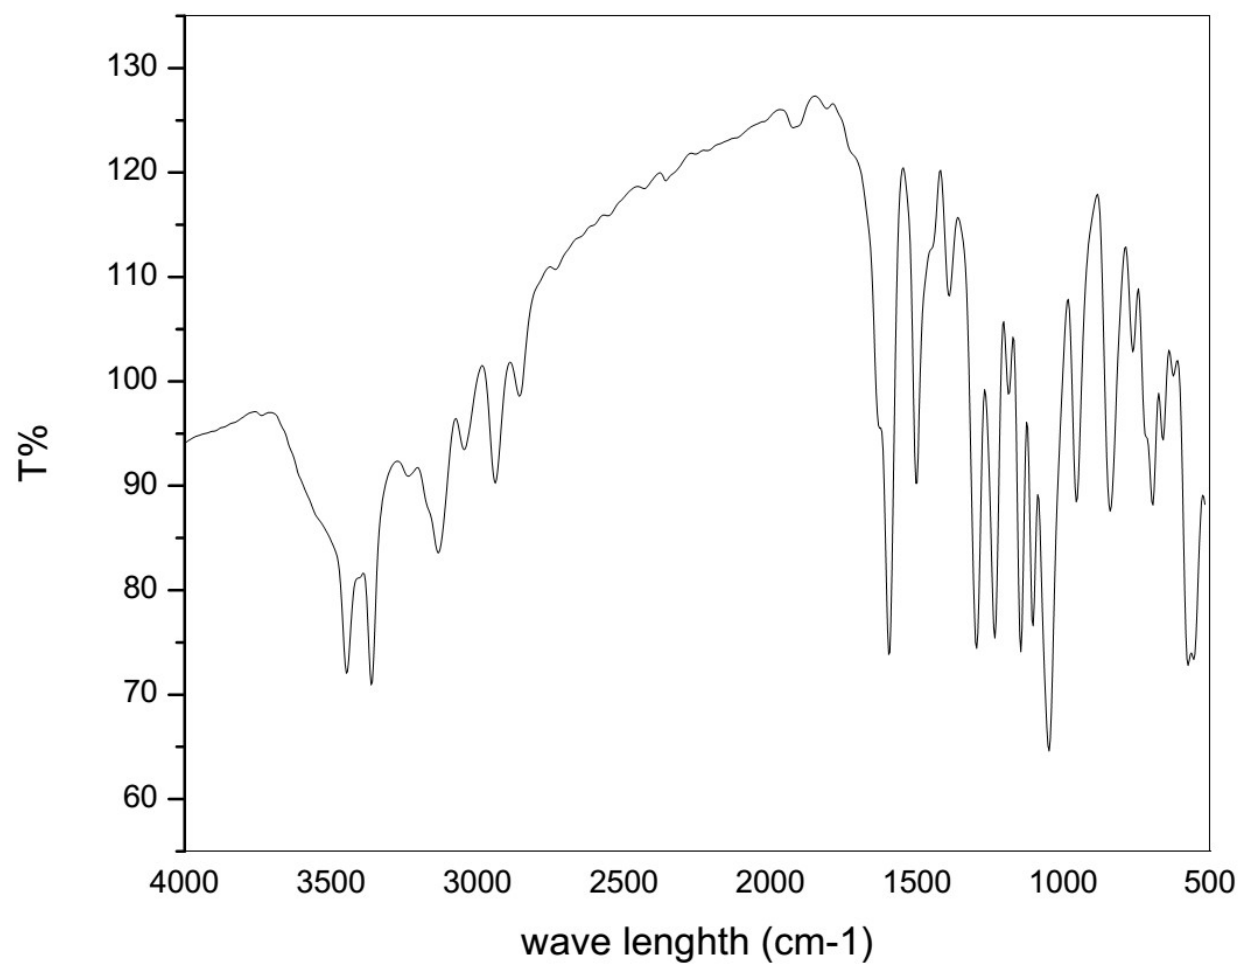

**Figure : IR chart of compound 6a**

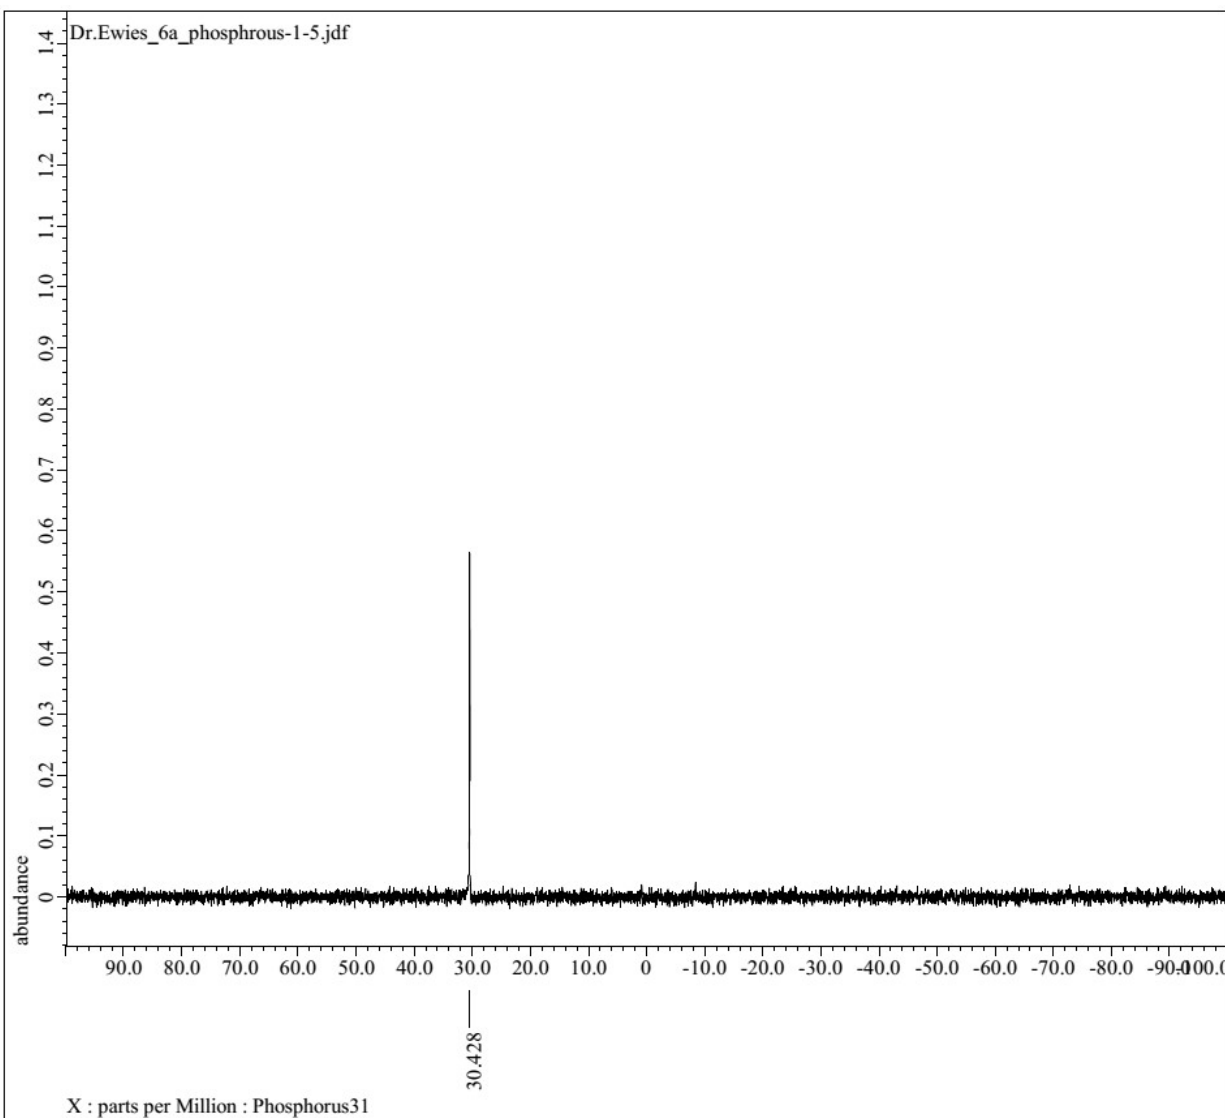

**Figure :  $^{31}\text{P}$  NMR of compound 6a**

Ewis-6a #844 RT: 2.90 AV: 1 NL: 2.28E5

T: {0,0} + c EI Full ms [50.00-650.00]

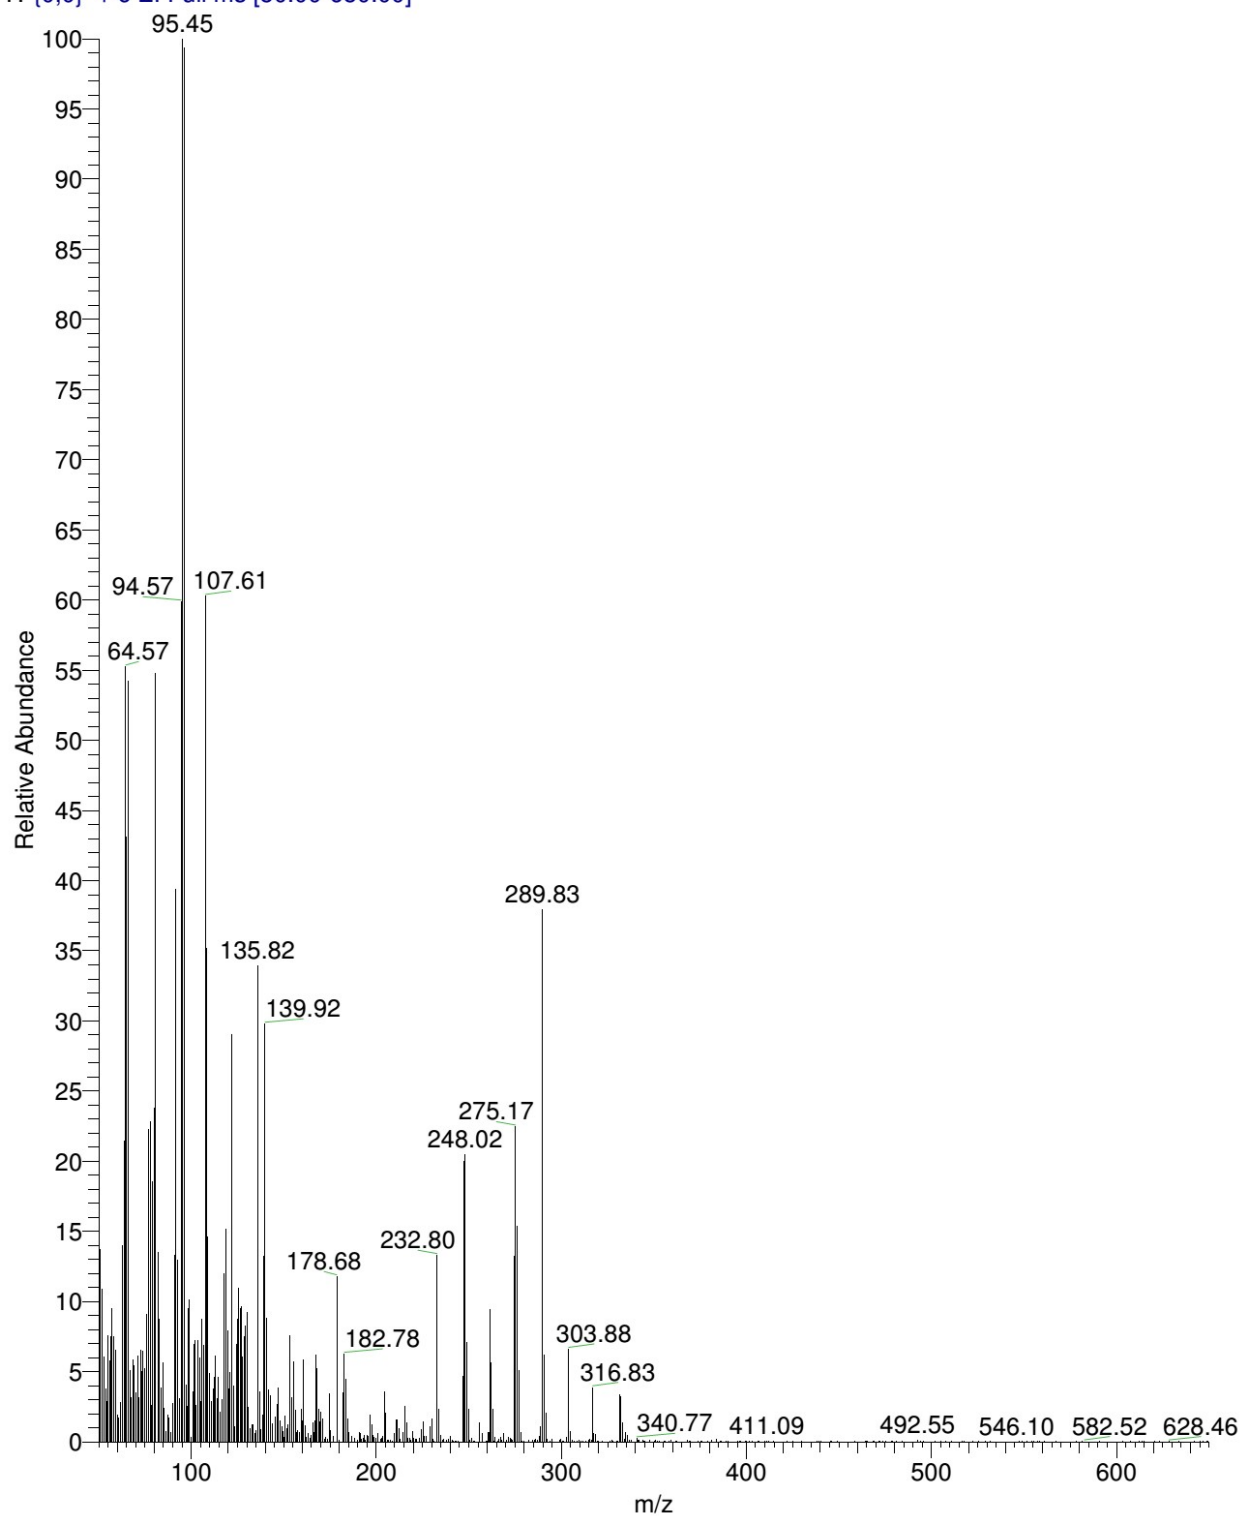

Figure : Mass spectrum of compound 6a

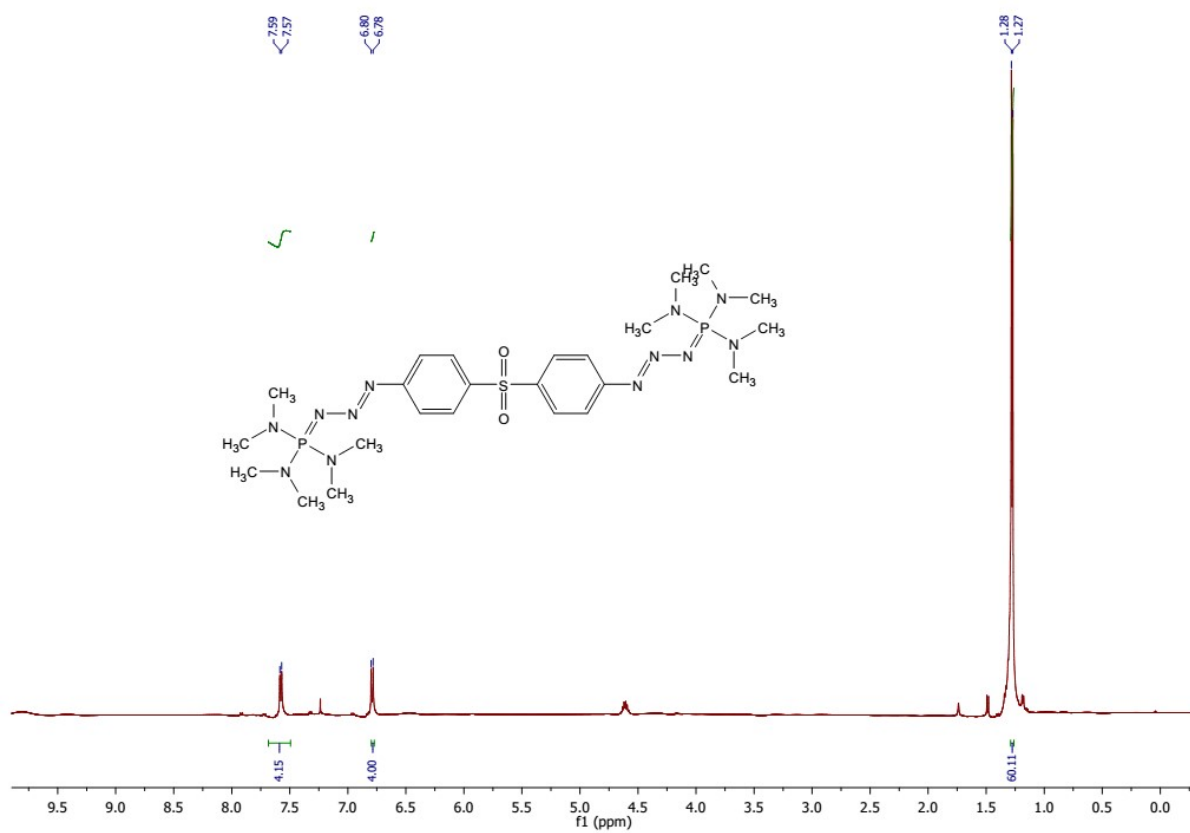

Figure : <sup>1</sup>H NMR of compound 6b

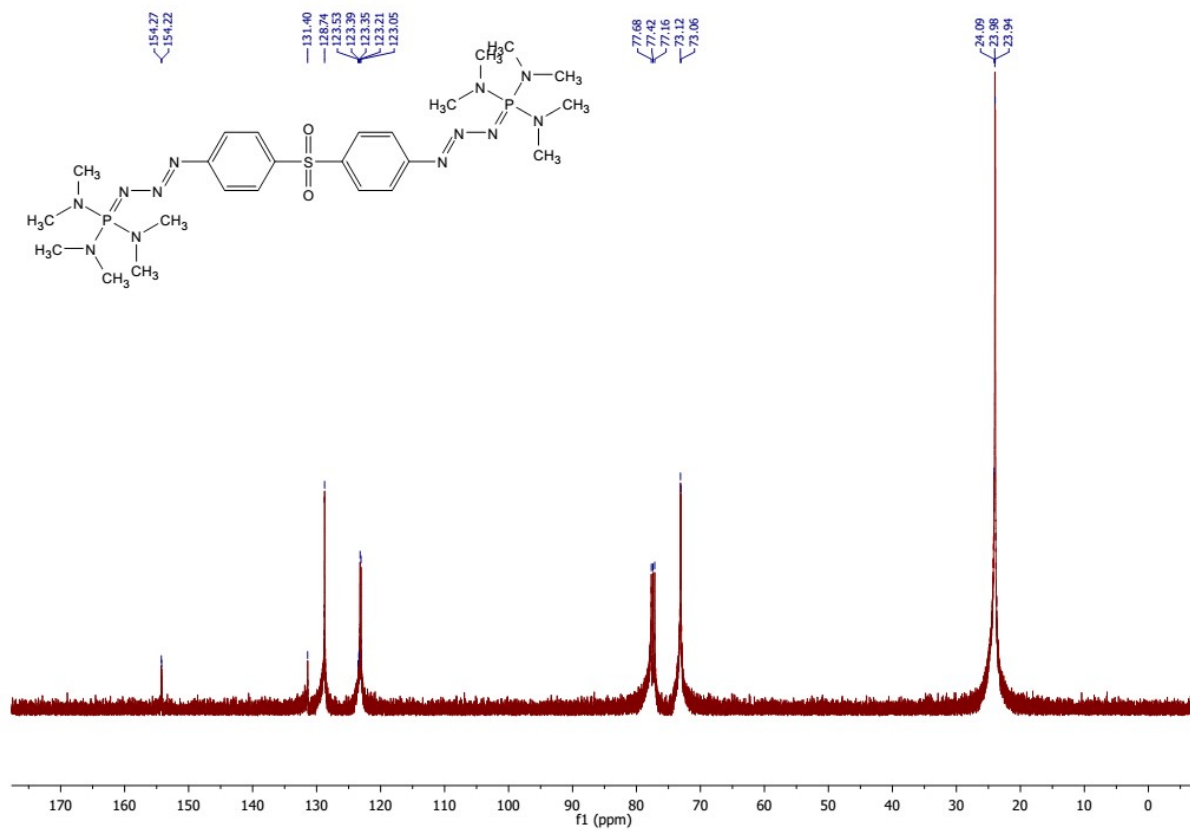

**Figure : <sup>13</sup>C NMR of compound 6b**

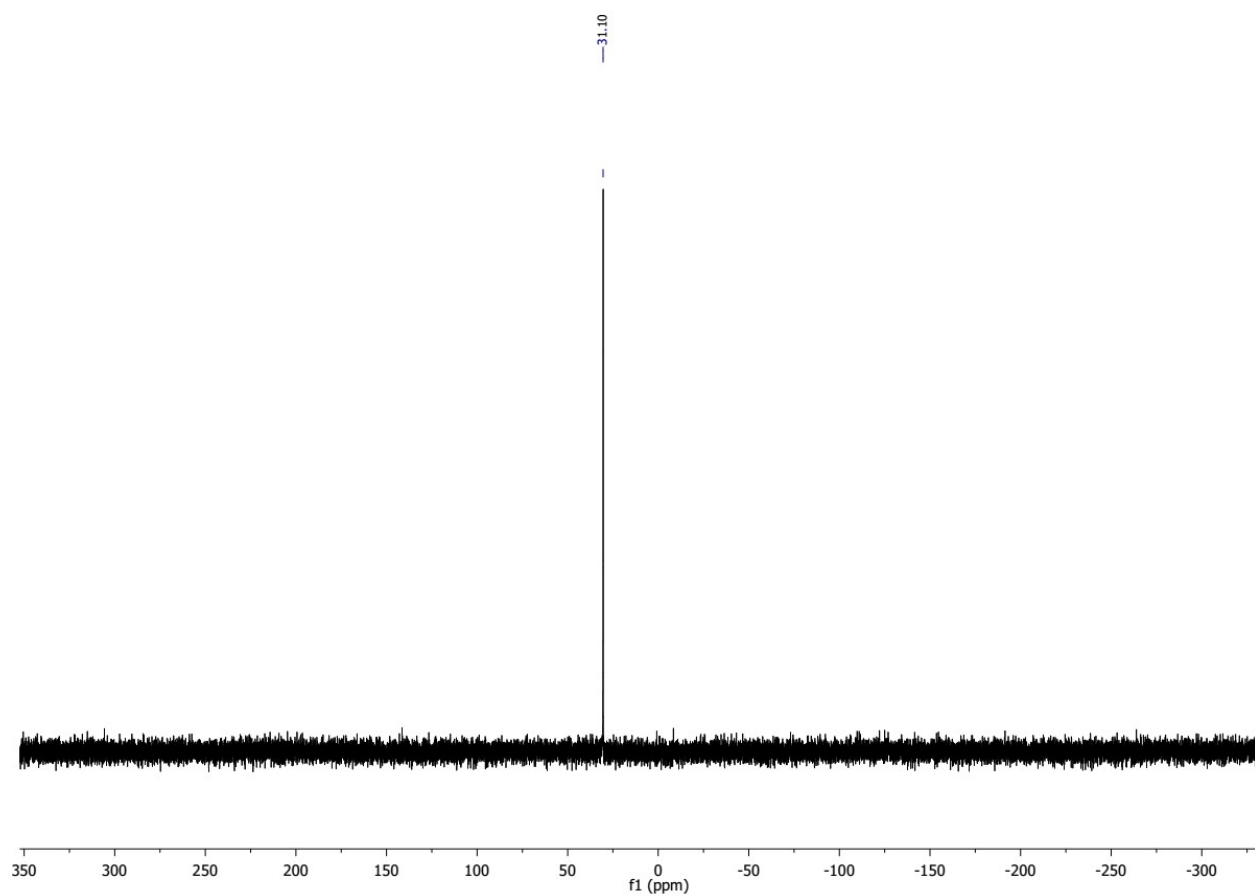

**Figure :  $^{31}\text{P}$  NMR of compound 6b**

Ewis-6b #521 RT: 1.80 AV: 1 NL: 3.41E5

T: {0,0} + c EI Full ms [50.00-850.00]

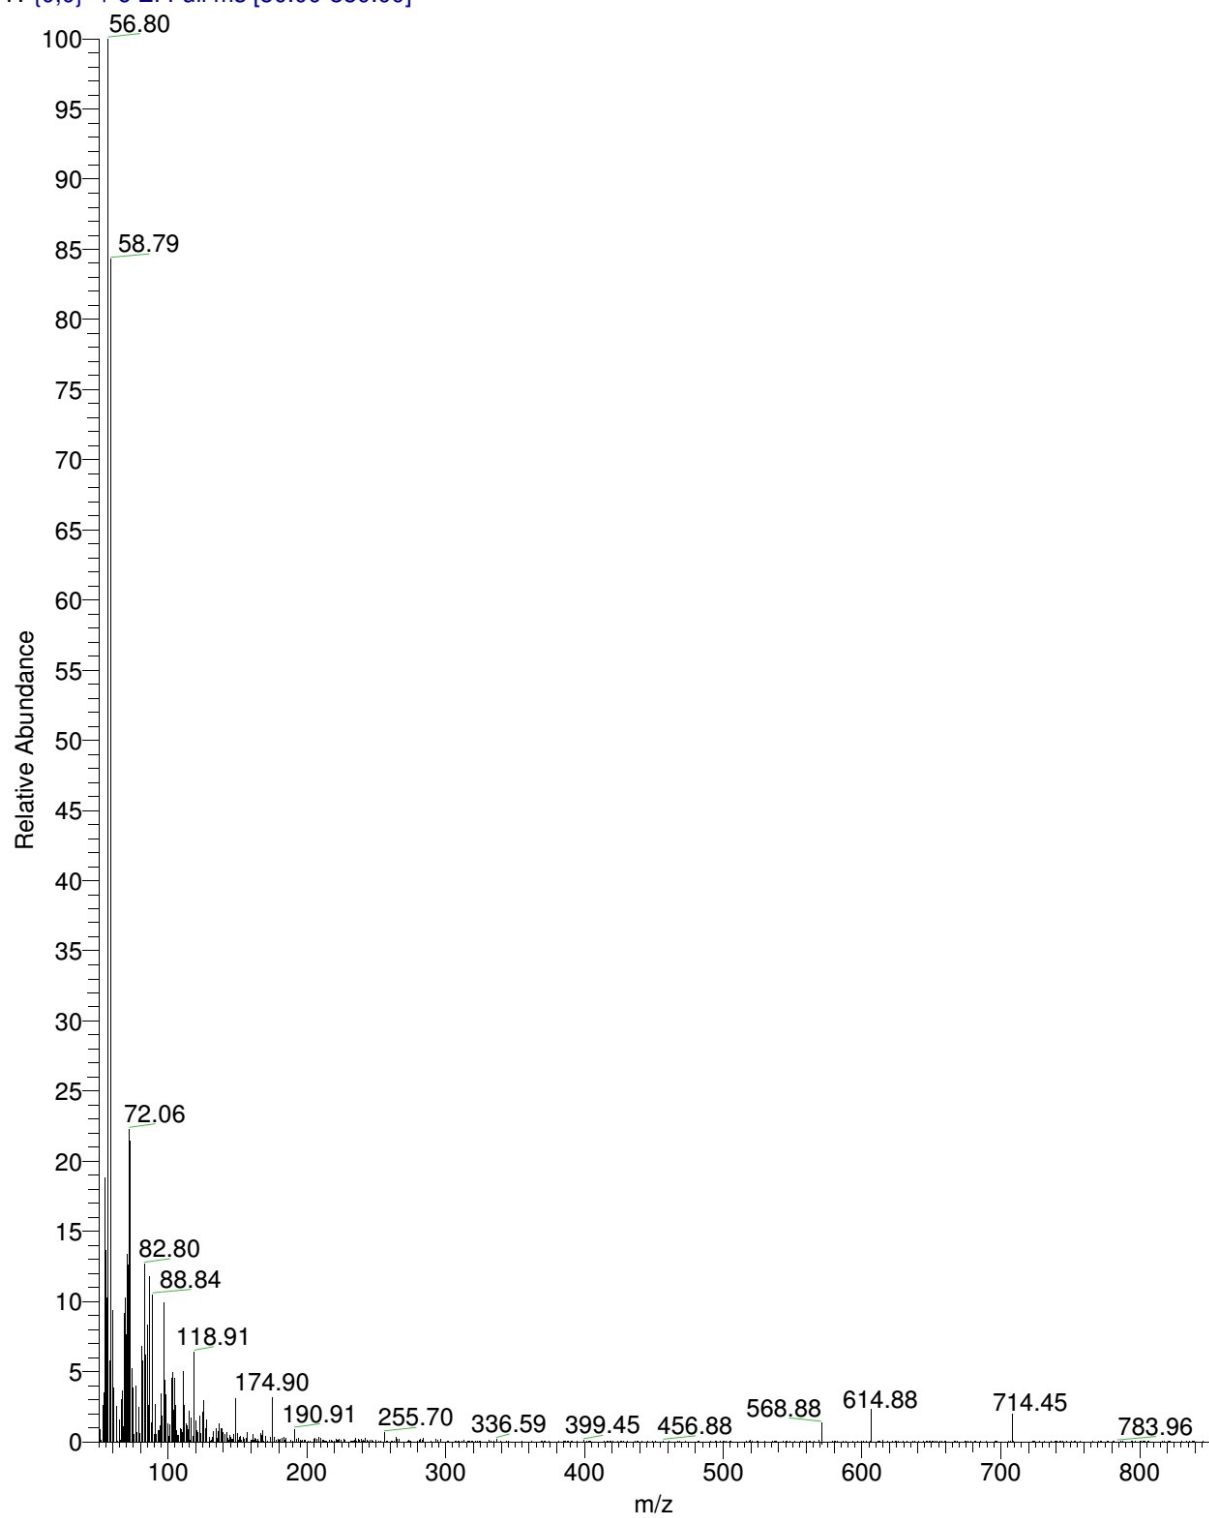

Figure : Mass spectrum of compound 6b

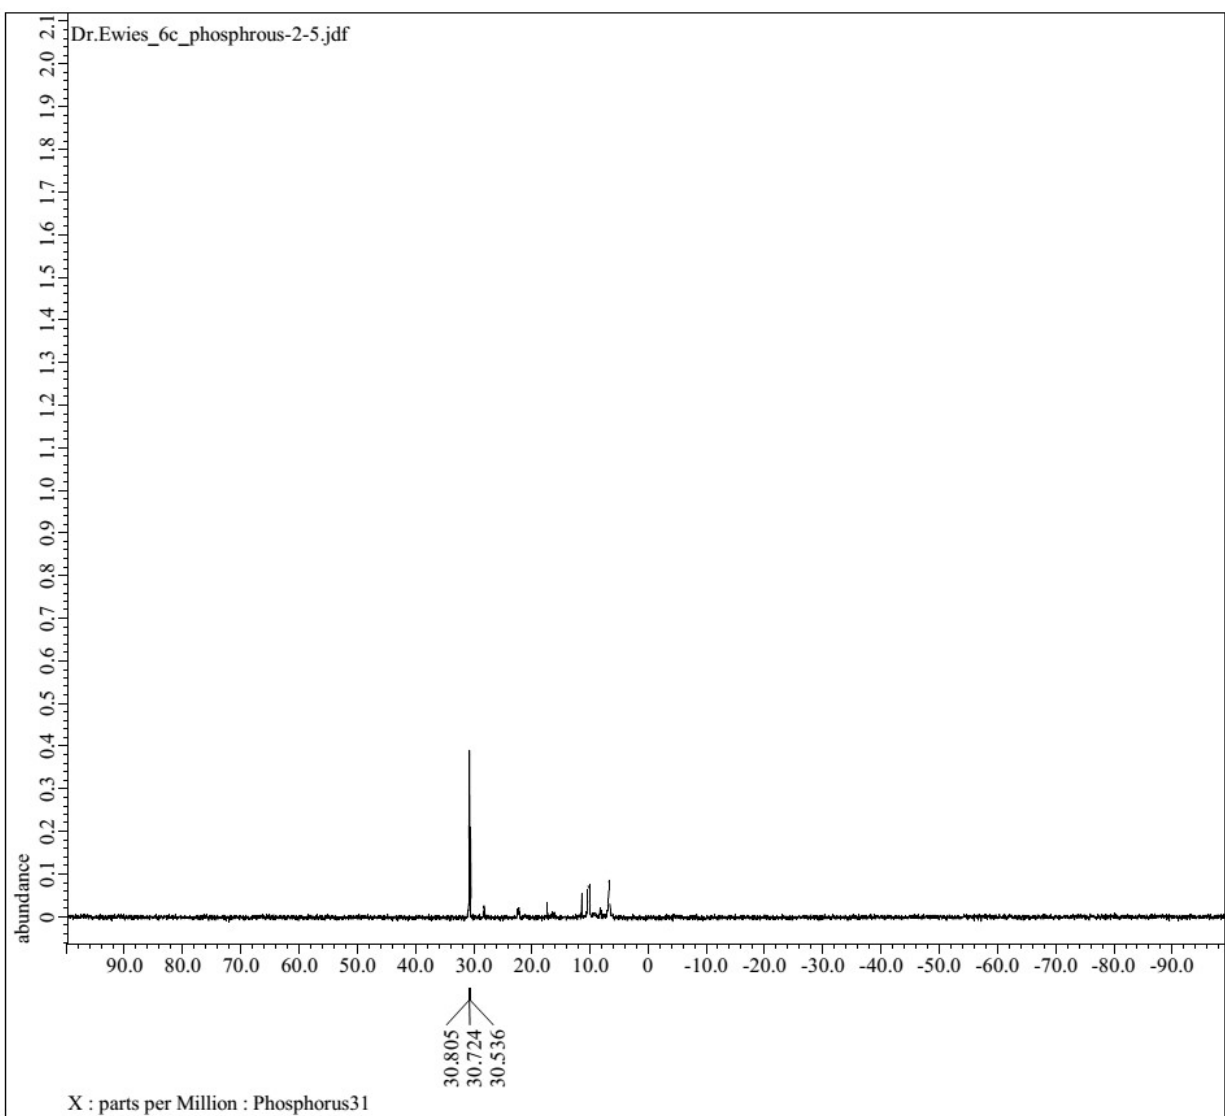

**Figure :  $^{31}\text{P}$  NMR of compound 6c**



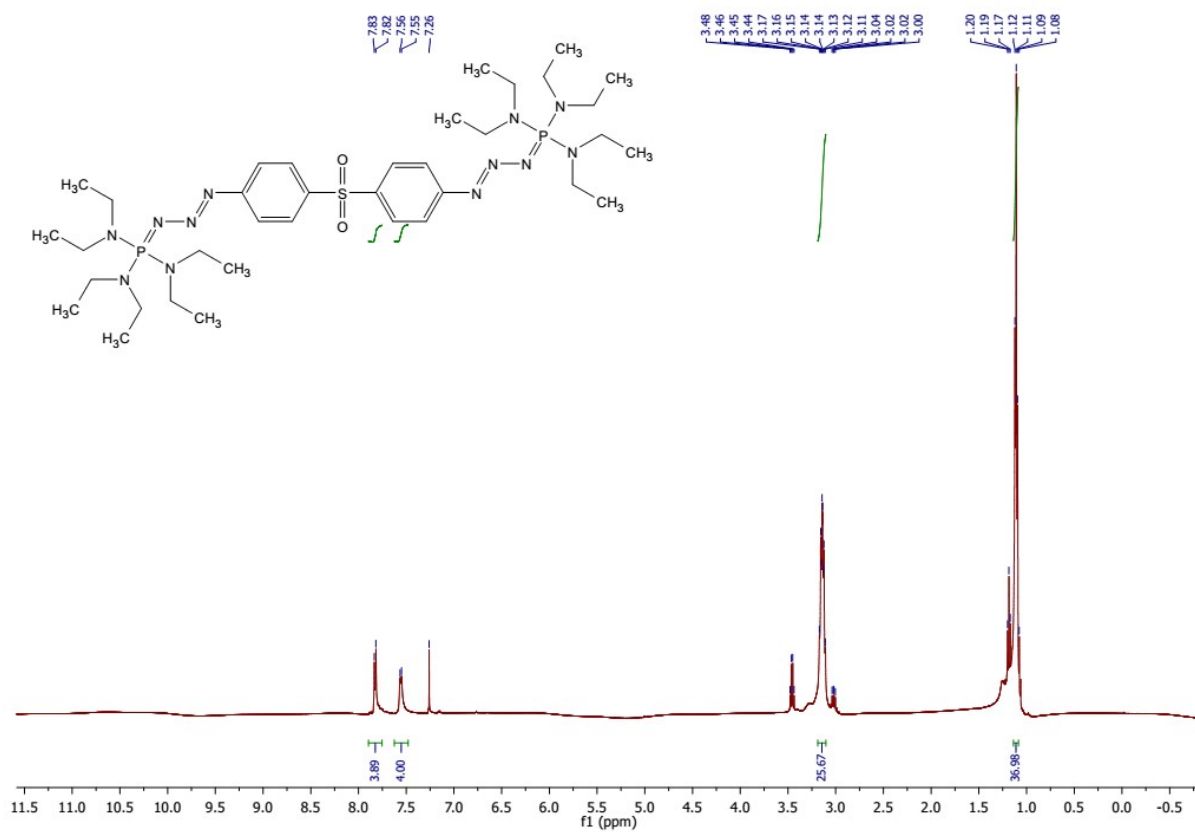

**Figure : <sup>1</sup>H NMR of compound 6d**

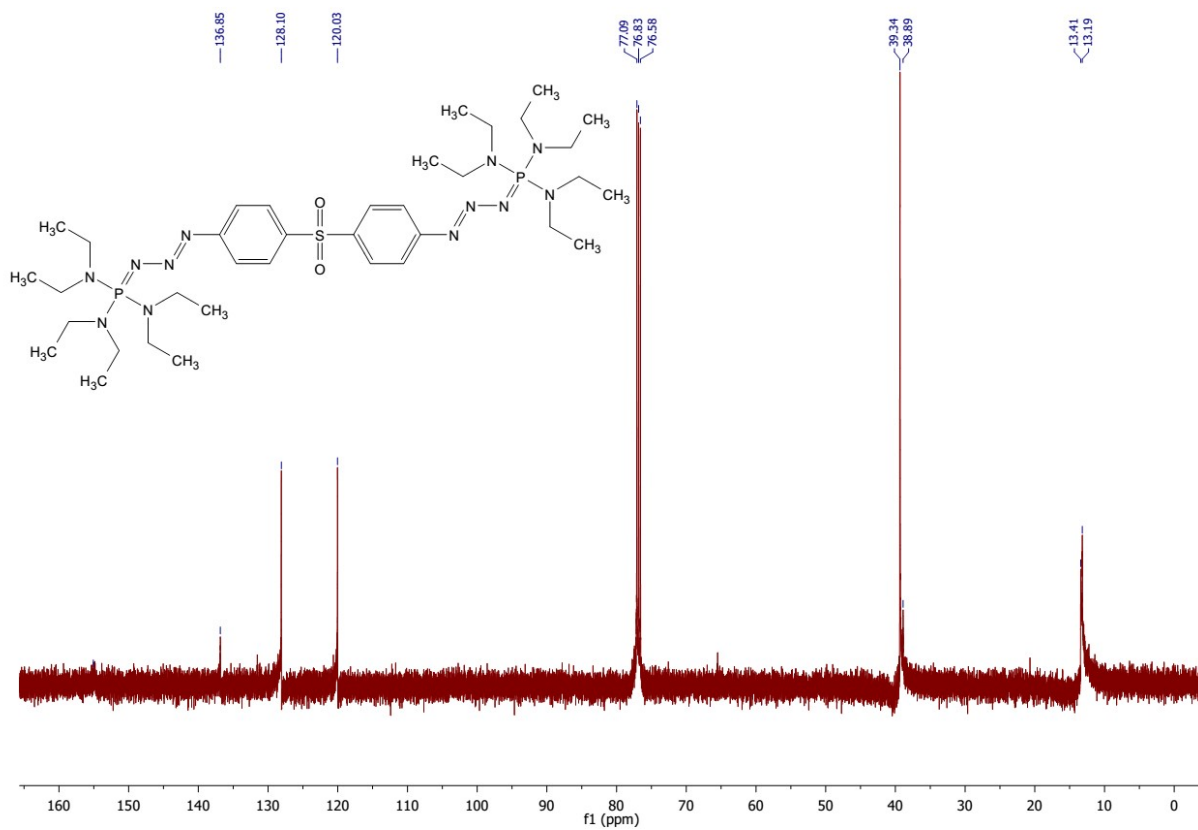

**Figure : <sup>13</sup>C NMR of compound 6d**

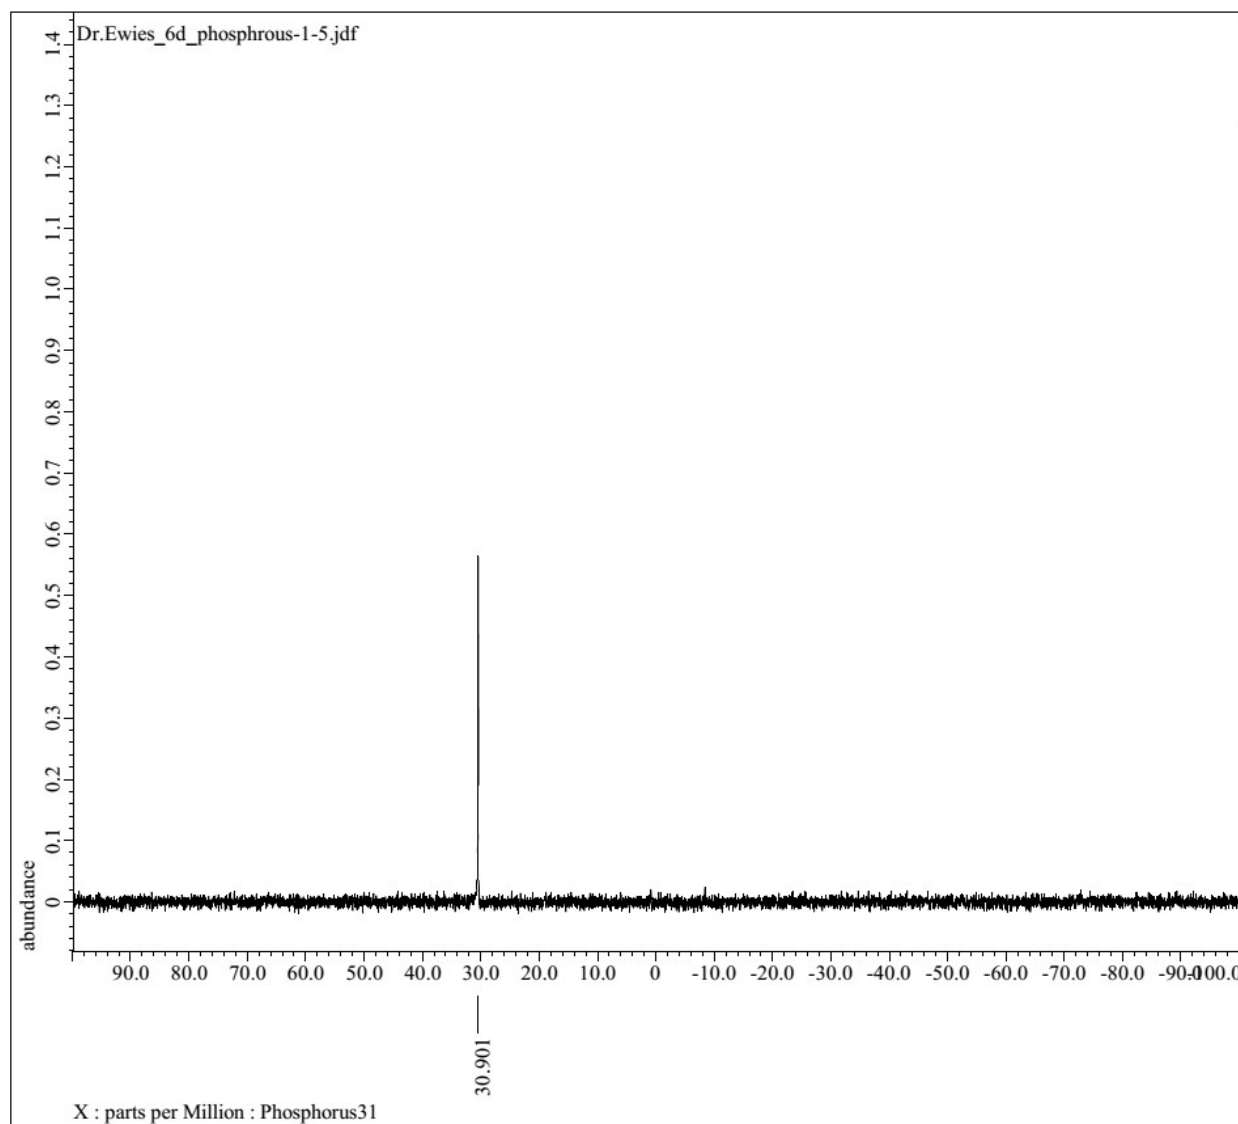

**Figure :  $^{31}\text{P}$  NMR of compound 6d**

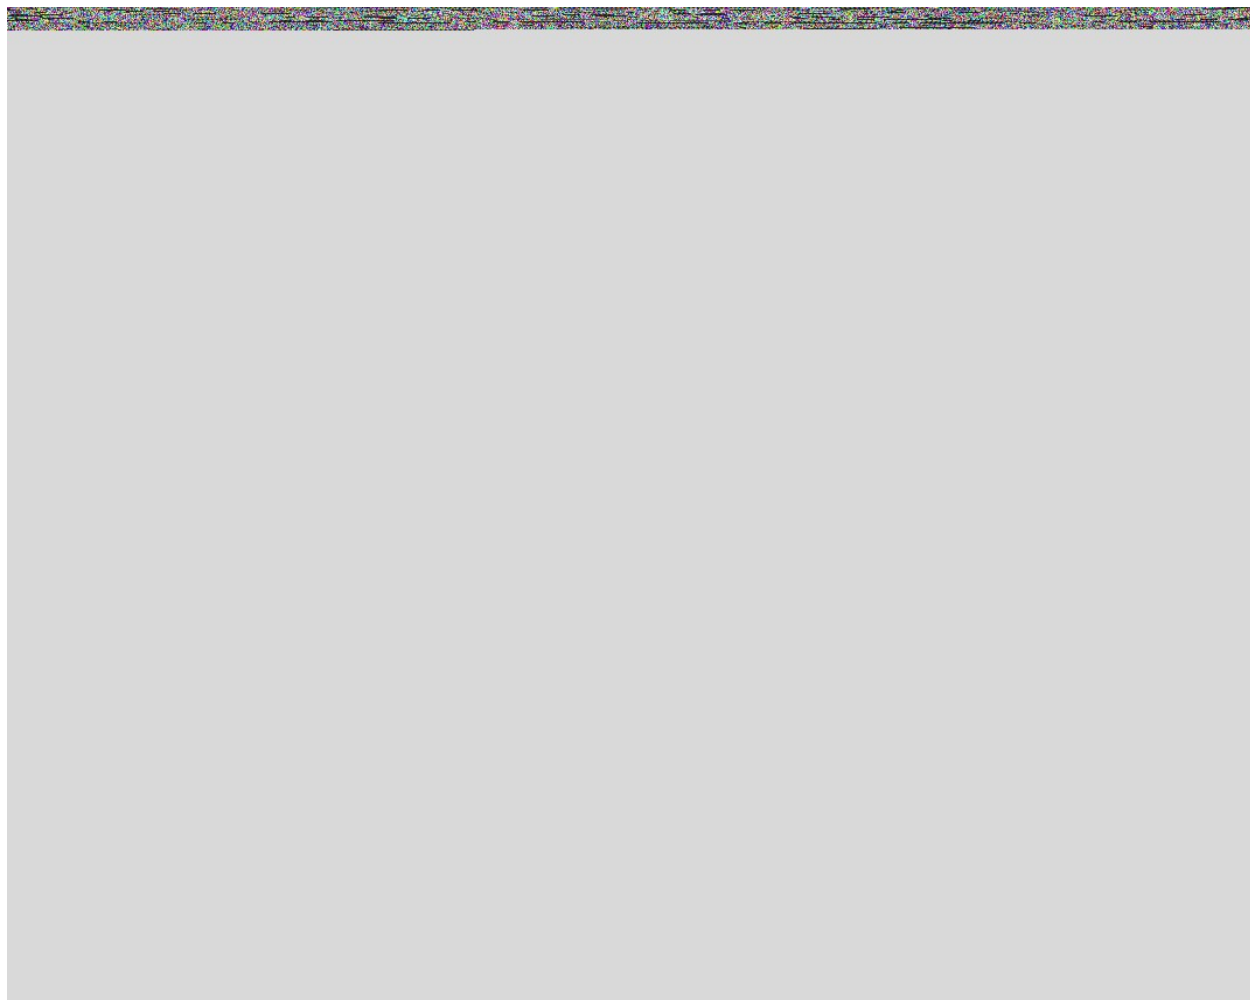

**Figure : IR chart of compound 6d**

Ewis-6d #1154 RT: 3.96 AV: 1 NL: 1.16E4

T: {0,0} + c EI Full ms [50.00-850.00]

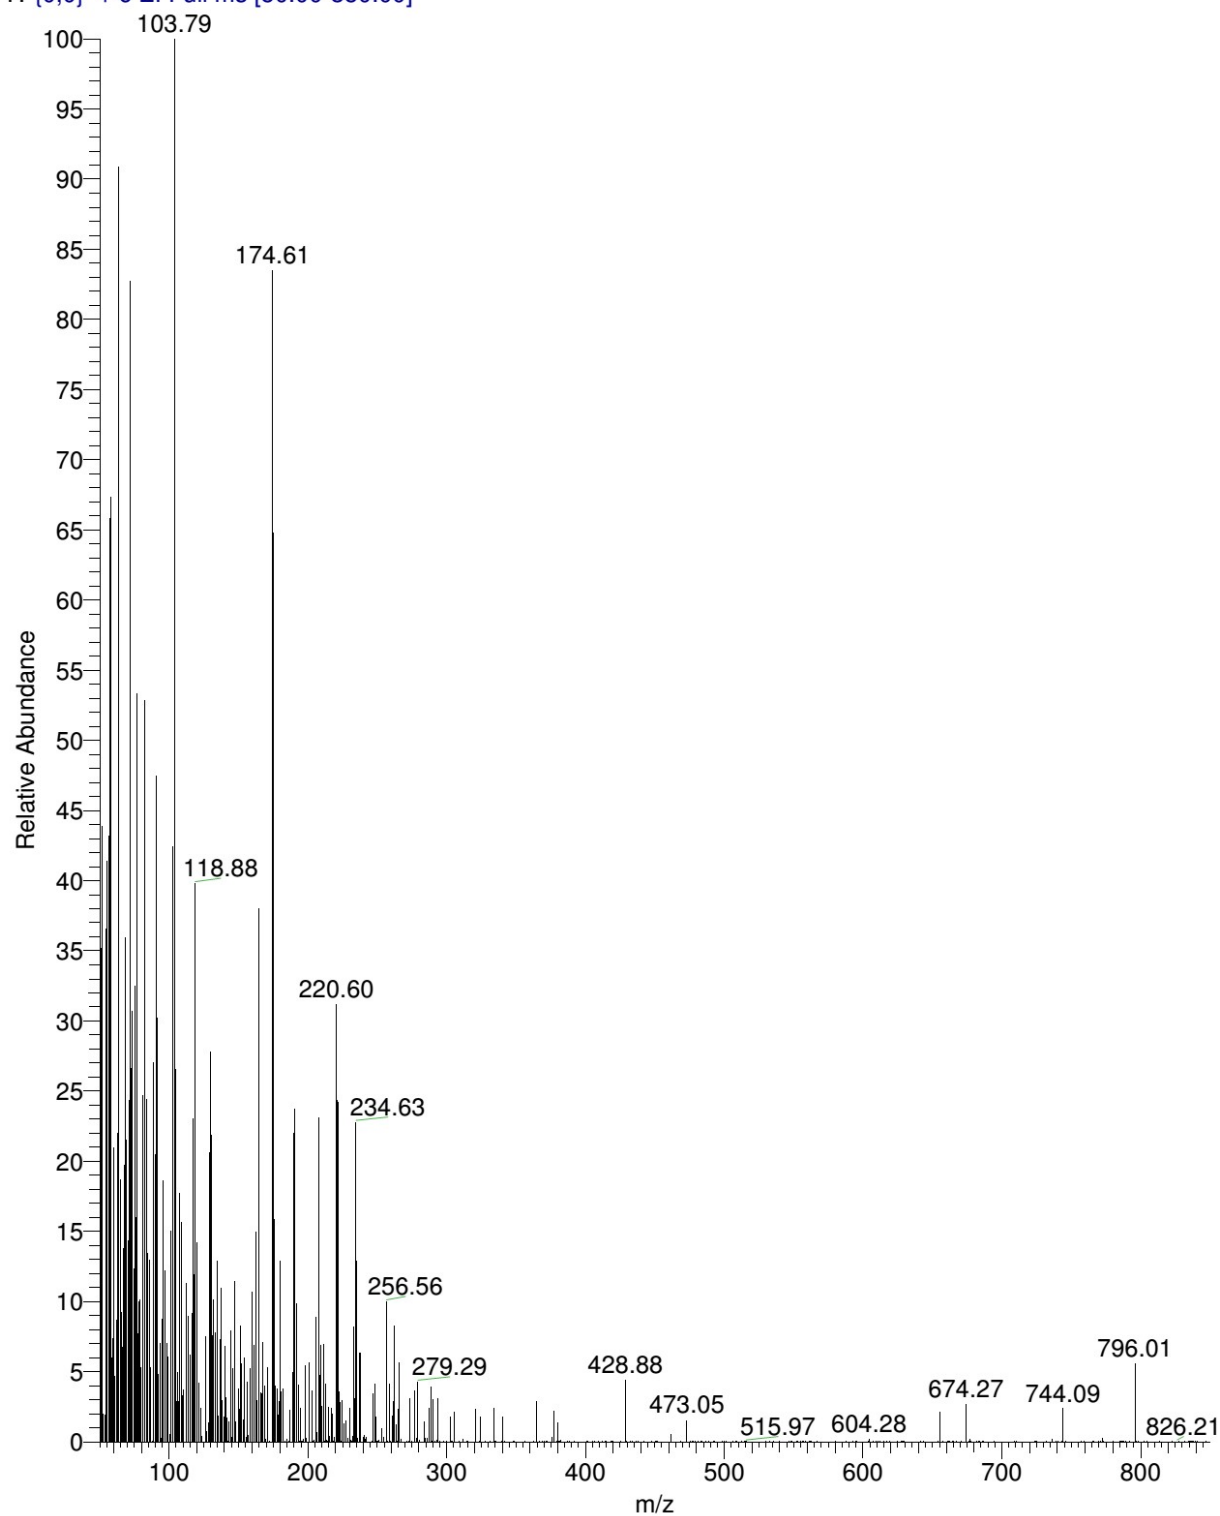

Figure : mass spectrum of compound 6d
